1 Evidence of non-tandemly repeated rDNAs and their  
2 intragenomic heterogeneity in *Rhizophagus irregularis*

3 **Authors**

4 Taro Maeda<sup>1</sup>, Yuuki Kobayashi<sup>1</sup>, Hiromu Kameoka<sup>1</sup>, Nao Okuma<sup>1</sup>, Naoya Takeda<sup>2</sup>, Katsushi  
5 Yamaguchi<sup>3</sup>, Takahiro Bino<sup>3</sup>, Shuji Shigenobu<sup>3,4\*</sup>, Masayoshi Kawaguchi<sup>1,4\*</sup>

6 1 Division of Symbiotic Systems, National Institute for Basic Biology, Japan

7 2 School of Science and Technology, Kwansei Gakuin University, Japan

8 3 Functional Genomics Facility, National Institute for Basic Biology, Japan

9 4 The Graduate University for Advanced Studies [Sokendai], Japan

10 \*Corresponding authors

11 †shige@nibb.ac.jp

12 ‡masayosi@nibb.ac.jp

## 13 **Abstract**

14 Arbuscular mycorrhizal fungus (AMF) species are one of the most widespread symbionts of land  
15 plants. Our substantially improved reference genome assembly of a model AMF, *Rhizophagus irregularis*  
16 DAOM-181602 (total contigs = 210), facilitated discovery of repetitive elements with unusual  
17 characteristics. *R. irregularis* has only ten or eleven copies of complete 45S rDNAs, whereas the general  
18 eukaryotic genome has tens to thousands of rDNA copies. *R. irregularis* rDNAs are highly heterogeneous  
19 and lack a tandem repeat structure. These findings provide evidence for the hypothesis that rDNA  
20 heterogeneity depends on the lack of tandem repeat structures. RNA-Seq analysis confirmed that all  
21 rDNA variants are actively transcribed. Observed rDNA/rRNA polymorphisms may modulate translation  
22 by using different ribosomes depending on biotic and abiotic interactions. The non-tandem repeat  
23 structure and intragenomic heterogeneity of AMF rDNA/rRNA may facilitate adaptation to a various  
24 environmental condition including the broad host range.

25

## 26 Introduction

27 The arbuscular mycorrhizal fungus (AMF) is an ancient fungus with origins at least as old as  
28 the early Devonian period<sup>1,2</sup>. AMF colonizes plant roots and develops highly branched structures  
29 called arbuscules in which soil nutrients (phosphate and nitrogen) are efficiently delivered to the  
30 host plant<sup>3</sup>. AMF forms symbiotic networks with most land plant species<sup>4,5</sup>, and the mycelial  
31 network formed by various AMF species contributes to plant biodiversity and productivity within  
32 the terrestrial ecosystem<sup>6</sup>. The distinctive features of AMF have made it an important model in  
33 ecology and evolution<sup>7,8</sup>; these features include coenocytic mycelia<sup>5</sup>, nutrition exchange with plant,  
34 classification as an obligate biotroph<sup>9</sup>, signal crosstalk during mycorrhiza development<sup>9,10</sup> and  
35 extremely high symbiotic ability<sup>9,11</sup>.

36 Recently, multiple genome projects have advanced the understanding of AMF species.  
37 Genomic data have been provided for *Rhizophagus irregularis* DAOM-181602<sup>12,13,14</sup>, *Gigaspora*  
38 *rosea*<sup>12</sup>, *Rhizophagus clarus*<sup>15</sup>, and other isolates of *R. irregularis*<sup>14,16</sup>. These studies revealed  
39 potential host-dependent biological pathways<sup>17,12</sup> and candidate genes for plant infection and sexual  
40 reproduction<sup>12,15,16</sup>. However, fragmented genome sequences limit the ability to analyze repetitive  
41 structures and to distinguish between orthologous and paralogous genes<sup>14</sup>. The first published  
42 genome sequence of *R. irregularis* DAOM-181602 (JGI\_v1.0)<sup>17</sup> contained 28,371 scaffolds and an  
43 N50 index of 4.2 kb (Supplementary Table 1). The second sequence, by Lin et al. 2014 (Lin14)<sup>13</sup>,  
44 contained 30,233 scaffolds with an N50 of 16.4 kb (Supplementary Table 1). Recently published  
45 assemblies by Chen et al. 2018 (JGI\_v2.0)<sup>14</sup> contained 1,123 scaffolds with an N50 of 336.4 kb  
46 (Supplementary Table 1). The quality of genomic sequence data for other AMF species did not  
47 surpass that of DAOM-181602<sup>12,15</sup>. In contrast, many fungi that are not AMF species contain less  
48 than several hundred scaffolds and N50 lengths over 1 Mb<sup>18</sup>. For example, a genomic sequence of an  
49 asymbiotic fungus closely related to AMF, *Rhizopus delemar* (GCA000149305.1), was constructed  
50 from 83 assemblies with an N50 of 3.1 Mb<sup>19</sup>. Thus, we here present an improved whole-genome  
51 sequence of *R. irregularis* DAOM-181602 to facilitate examination of the genomics underlying  
52 specific features of AMF species. Taking an advantage of the highly contiguous assembly with little  
53 ambiguous regions, we focus on the investigation of the repetitive structures including transposable  
54 elements, highly duplicated genes, and rDNA gene copies.

55 A general eukaryotic genome has tens to thousands of rDNA copies<sup>20</sup> (Supplementary Fig.  
56 1a), and the sequences of the copies are identical or nearly identical. However, since Sanders et al.  
57 (1995)<sup>21</sup>, many studies have indicated intracellular polymorphisms of rDNA (ITS) in various AMF  
58 species<sup>22–24</sup>, and the sequencing of isolated nuclei from *Claroideoglossum etunicatum* and  
59 *Rhizophagus irregularis* DAOM-181602 suggested sequence variation among the paralogous  
60 rDNAs, i.e., intragenomic heterogeneity<sup>13,25</sup>. This heterogeneity has potentially high impact of  
61 studying AMF species, because the rDNA is a fundamental marker of the AMF phylogeny and  
62 ecology<sup>8,26,27,28</sup>, and studies have assumed that these rDNAs have no intragenomic sequence  
63 variation<sup>29</sup>. Hence, determining the variation degree could cause a reevaluation of the previous  
64 understanding of geographic distribution<sup>8</sup>, species identification<sup>28</sup>, and evolutionary processes of  
65 AMF. However, the degree of the variation among the 48S rDNA paralogs has been ambiguous  
66 because previous studies by Sanger or Illumina sequencing were unable to distinguish each rDNA  
67 paralog in a genome. Moreover, the number of rDNA genes in an AMF genome has never been  
68 investigated.

69 The tandem repeat structure (TRS) of the rDNAs is also an attractive topic for evolutionary  
70 studies. General organisms require many rDNA copies to make a sufficient amount of rRNA for  
71 protein translation<sup>30,31</sup>. However, in the evolutionary time-scale, multicopy genes reduce in number  
72 due to homologous recombination (Supplementary Fig. 1b)<sup>32,33</sup> and single-strand annealing

73 (Supplementary Fig. 1c)<sup>34</sup>. To maintain the number of rDNAs, eukaryotes increase the number of  
74 copies by unequal sister chromatid recombination (USCR) using the rDNA TRS (Supplementary  
75 Fig. 1d,e)<sup>32</sup>. Because this rDNA replacement causes a bottleneck effect in the genome, almost all  
76 eukaryotes have homogenous rDNAs in their genomes<sup>20</sup>. This process, termed "concerted  
77 evolution," is an essential system to maintaining eukaryotic protein translation by ribosomes<sup>30</sup>. The  
78 heterogeneous rDNAs observed in AMF species implies the collapse of their concerted evolution,  
79 and suggest the unique maintenance system of rDNA copy number.

80 In this study, we built an improved reference genome assembly of *Rhizophagus irregularis*  
81 DAOM-181602, which allowed us to discover repetitive elements with unusual characteristics of the  
82 AMF genome. We identified unusually small number of rDNA genes in the *R. irregularis* genome.  
83 We also found that the rDNA copies are highly heterogeneous and lack a tandem repeat structure.  
84

85

## 86 Results

### 87 A highly contiguous and complete reference genome of DAOM-181602 88 generated by PacBio-based *de novo* assembly

89 We primarily used single-molecule, real-time (SMRT) sequencing technology for sequencing  
90 and assembling the *R. irregularis* genome. We generated a 76-fold whole-genome shotgun sequence  
91 (11.7 Gb in total) (Supplementary Table 2) from genome DNA isolated from a spore suspension of a  
92 commercial strain of *R. irregularis* DAOM-181602 using the PacBio SMRT sequencing platform. A  
93 total of 766,159 reads were generated with an average length of 13.1 kb and an N50 length of 18.8  
94 kb (Supplementary Table 2). We assembled these PacBio reads using the HGAP3 program<sup>35</sup> (149.9  
95 Mb composed of 219 contigs). To detect erroneous base calls, we generated 423 Mb of 101 bases-  
96 paired-end Illumina whole-genome sequence data (Supplementary Table 2) and aligned them to the  
97 HGAP3 assembly. Through variant calling, we corrected 3,032 single base call errors and 10,841  
98 small indels in the HGAP3 assembly. Nine contigs were almost identical to carrot DNA sequences  
99 deposited in the public database (Supplementary Table 3), and these were removed as contaminants  
100 derived from a host plant used by the manufacturer. We evaluated the completeness of the final  
101 assembly using CEGMA<sup>36</sup>; of the 248 core eukaryotic genes, 244 genes (98.4%) were completely  
102 assembled (Table 1 and Supplementary Table 1). Consequently, we obtained a high-quality  
103 reference genome assembly of *R. irregularis* DAOM-181602, which is referred to as RIR17.

104 Compared with previous assemblies<sup>13,14,17</sup>, RIR17 represents a decrease in assembly  
105 fragmentation (1,123 to 210) and an improvement in contiguity using the N50 contig length as a  
106 metric (Table 1 and Supplementary Table 1). The total size of the assembly was 9-59 Mb greater  
107 than that of previous versions, reaching 97.24% coverage of the whole genome (154 Mb)<sup>17</sup> (Table 1  
108 and Supplementary Table 1). The new assembly contains no ambiguous bases (N-bases), whereas  
109 previous assemblies had 30,115-6,925,426 N-bases (Table 1 and Supplementary Table 1).  
110 Approximately 1-7 Mb of sequences from previous assemblies were not contained in RIR17, and  
111 JGI\_v2.0 has one more conserved gene family than RIR17 (Supplementary Table 1), indicating that  
112 a few genomic parts remain to be uncovered by our improvement with continuous sequences. On the  
113 other hand, RIR17 was aligned with 95-99.2% of previous assemblies (Supplementary Table 4),  
114 suggesting that RIR17 covers the majority of the previously sequenced areas with high sequence  
115 contiguity. Moreover, RIR17 contained 8-47 Mb of regions unassigned in previous genomes  
116 (Supplementary Table 4). These regions are newly revealed by our improvement.

117 RIR17 contains a greater extent of repetitive regions than JGI\_v2.0. The RepeatModeler<sup>37</sup> and  
118 RepeatMasker<sup>37</sup> pipeline identified 64.4 Mb (43.03%) of RIR17 as repetitive regions  
119 (Supplementary Table 5). These regions total 18.9 Mb more than those of JGI\_v2.0 (Supplementary  
120 Table 5). Previous fosmid sequences predicted that DAOM-181602 contains ~55 Mb of repetitive  
121 regions<sup>17</sup>, suggesting that RIR17 covers the majority of the repetitive regions of DAOM-181602.

122 We confirmed a unique repeat profile in the AMF genome. The majority of the interspersed  
123 repeats (62.83%) could not be categorized with known repeat classes (Supplementary Table 5),  
124 indicating that the AMF genome accumulated novel classes of interspersed repeats. Moreover,  
125 DAOM-181602 lacks short interspersed nuclear elements (SINEs), which are abundant in closely  
126 related fungi (Supplementary Table 5). Several types of SINEs proliferate using transposases on  
127 long interspersed nuclear elements (LINEs)<sup>38</sup>. Although the AMF has 23 LINEs containing the  
128 transposase gene (Supplementary Table 6), SINEs have never been found in previous genomes<sup>13,14,17</sup>  
129 or RIR17. DAOM-181602 may have a system to suppress the invasion and proliferation of SINEs  
130 (e.g., a high number of very active Argonaute proteins, as predicted by Tisserant et al.<sup>17</sup>).

131

## 132 **New gene annotation for DAOM-181602 details gene family expansion** 133 **in AMF**

134 Using the RIR17 assembly together with strand-specific RNA-Seq data ("Rir\_RNA\_SS" in  
135 Supplementary Table 2), we built a set of 41,572 gene models (Supplementary Tables 6 and 7). Of  
136 the genes predicted, 27,859 (67.0%) had either RNA-Seq expression support, homology support or  
137 protein motif support (Supplementary Tables 6 and 7). The gene models having any support were  
138 submitted to the DDBJ as standard genes and were used in downstream analyses. The models having  
139 no support were assigned as "PROVISIONAL" gene models (Supplementary Tables 6 and 7). Using  
140 Orthofinder with previous genomic gene sets indicated that our gene models cover the majority of  
141 previously provided genes (Supplementary Fig. 2). Although new models showed more coverage of  
142 "Benchmarking Universal Single-Copy Orthologs" (BUSCOs)<sup>39</sup> (Supplementary Table 7) than  
143 JGI\_v1.0 and Lin14, their gene completeness was slightly lower than that of JGI v2.0 (9 BUSCO  
144 families overlooked, Supplementary Table 7), indicating the advantage of using the JGI annotation  
145 pipeline to discuss the gene variety in DAOM-181602 (Chen et al 2018<sup>14</sup>). However, we considered  
146 our model set suitable for the analysis of the repetitive region and highly paralogous genes because  
147 our model is based on highly continuous assemblies, and the number of genes on repetitive regions  
148 was increased to 2,349-12,559 genes from the number in JGI\_2.0 (Supplementary Table 8).

149 *R. irregularis* has one of the largest numbers of genes in fungi (Supplementary Fig. 3). Our  
150 ortholog analyses indicates that the gene number inflation was caused by lineage-specific expansions  
151 of gene families and not by whole-genome duplications. An Orthofinder analysis of nine fungal  
152 genomes and two animal data sets (Supplementary Table 9) showed that many of the single-copy  
153 genes in other fungi were also single copies in RIR17 (216/239 families, Supplementary Table 10),  
154 negating the possibility of whole-genome duplication in *R. irregularis*. The large number of  
155 "species-specific single-copy" (SSSC) genes in DAOM-181602 (10,354 genes, Fig. 1a,  
156 Supplementary Table 10) suggests that the AMF genes inflated by new gene constructions through  
157 gene fusion and mutation accumulation. Moreover, several common gene families in Opisthokonta  
158 also contributed to gene inflation; the *R. irregularis* lineage had 92 rapidly expanded (RE) families,  
159 containing 8,952 genes (Fig. 1a, d-e, Supplementary Tables 10 and 11), suggesting that *R.*  
160 *irregularis* has also acquired many genes by the duplication of particular gene families.

161 The motif annotation indicates that inflated genes may contribute to signaling pathways of  
162 AMF species. Our Pfam search annotated 1,620 SSSC genes and 6,755 RE genes (Fig. 1b, f,  
163 Supplementary Tables 6 and 10). The most frequently observed motif was "Protein tyrosine kinase;  
164 PF07714" (Fig. 1b, f, Supplementary Table 12), which is often found in signaling proteins in  
165 multicellular organisms<sup>40</sup>, consistently with previous genome studies<sup>14</sup>. Other signal-related motifs  
166 (e.g., Sell repeat and BED zinc finger) were also found in the inflated genes (Fig. 1b, f,  
167 Supplementary Table. 12). AMF has developed a unique signal pathway for symbiosis (e.g.,  
168 establishments of symbiosis with pathways using *sis1* and strigolactones<sup>41</sup>). This inflation of  
169 signaling-related genes may have led the development of a complex signaling pathway in AMF.

170 We then investigated the contribution of the transposable elements (TEs) to gene inflation  
171 based on the overlapping of highly paralogous genes and the TEs. Previous studies hypothesized that  
172 the gene inflation in *R. irregularis* relates with the expansion of TEs<sup>14</sup>. Our analysis showed that in  
173 several RE families (e.g., OG0000090 and OG0000020), over 90% of the genes were located with  
174 TEs (Fig. 1d,e, Supplementary Table 13), suggesting that TEs accelerated the gene expansion in  
175 these families. However, some of the families had no correspondence with TEs (e.g., "OG0000025",  
176 and "OG0000058" in Fig. 1c, e). In SSSC genes, TEs were slightly more frequently found in SSSCs  
177 with motifs than in all gene sets but were less frequently found in SSSCs without motifs (Fig. 1c).  
178 This detailed analysis supports the contribution of TEs to gene inflation in several gene families but  
179 also clarified that several families show TE-independent expansion. Although more genome data for

180 AMF species and sister groups are required to reveal the gene expansion process and its contribution  
181 to AM symbiosis, our data provide a fundamental dataset to reveal the evolution of gene redundancy  
182 in AMF species.

183

184

## 185 **Losing conserved fungal genes**

186 Previous AMF studies suggested the loss of several categories of genes by symbiosis with  
187 plant<sup>12,13,17</sup>. Our RIR17 genome assembly confirmed the loss of genes involved in the degradation of  
188 plant cell walls such as cellobiohydrolases (GH6 and GH7 in the CAZy database), polysaccharide  
189 lyases (PL1 and PL4), proteins with cellulose-binding motif 1 (CBM1), and lytic polysaccharide  
190 monooxygenases (Supplementary Tables 6 and 14) and nutritional biosynthetic genes, including  
191 fatty acid synthase (FAS) and the thiamine biosynthetic pathway (Supplementary Table 15). Given  
192 that fatty acids and thiamine are essential nutrients for fungi<sup>42,43</sup>, *R. irregularis* should take up those  
193 essential nutrients from a host plant without digestion of the plant cell wall. Several recent papers  
194 have described the transport of lipids from plants to AMF<sup>44-46</sup>.

195

## 196 ***R. irregularis* has an exceptionally low rDNA copy number among** 197 **eukaryotes**

198 The general eukaryotic genome has tens to thousands of rDNA copies<sup>20</sup> (Supplementary Fig.  
199 1a). However, the RIR17 genome assembly contained only ten copies of the complete 45S rDNA  
200 cluster, which was composed of 18S rRNA, ITS1, 5.8S rRNA, ITS2, and 28S rDNAs (Fig. 2a,  
201 Supplementary Table 16). To confirm that no rDNA clusters were overlooked, we also estimated the  
202 rDNA copy number based on the read depth of coverage. Mapping the Illumina reads of the genomic  
203 sequences ("Rir\_DNA\_PE180") onto the selected reference sequences indicated that the coverage  
204 depth of the consensus rDNA was 8-11 times deeper than the average coverage depth of the single-  
205 copy genes (Fig. 2b, Supplementary Table 17), the number of rDNA copies is approximately 10, and  
206 the RIR17 assembly covers almost all of the rDNA copies. This AMF rDNA copy number is the  
207 lowest among eukaryotes<sup>47</sup> other than pneumonia-causing *Pneumocystis* (one rDNA)<sup>48</sup> and malaria-  
208 causing *Plasmodium* (seven rDNAs)<sup>49</sup>.

209 This low copy number suggests a unique ribosome synthesis system in AMF. The rDNA copy  
210 number has relevance for the efficiency of translation because multiple rDNAs are required to  
211 synthesize sufficient rRNA. For instance, an experimental decrease in rDNA copy number in yeast  
212 (approximately 150 rDNAs in wild type) resulted in no isolated strain having <20 copies, which is  
213 considered the minimum number to allow yeast growth<sup>30</sup>. The doubling time of yeast with 20 rDNA  
214 copies (TAK300) was 20% longer than that of the wild type<sup>30</sup>. In DAOM-181602, successive  
215 cultivation in an infected state with a plant has been widely observed, suggesting that this  
216 exceptionally small rDNA copy number is enough to support growth. The multinucleate feature of  
217 AMF would increase the rDNA copy number per cell and thereby perhaps supply enough rRNA to  
218 support growth. A similar trend in rDNA reduction is observed in the organellar DNA (e.g.,  
219 mitochondria and plastids)<sup>50</sup>. Revealing the details of translation in AMF requires a future tracking  
220 study of the rRNA production and degradation process in AMF. Elucidation of the mechanism to  
221 produce mass rRNAs from a few rDNAs may contribute the understanding of not only AMF  
222 evolution but also other polynuclear cells (e.g., striated muscle and ulvophyceae green algae) and  
223 symbiont-derived organelles.

224

## 225 ***R. irregularis* rDNAs are heterogeneous and completely lack a TRS**

226 Interestingly, none of the RIR17 rDNAs form a TRS, in contrast to most eukaryotic rDNAs,  
227 which comprise tens to hundreds of tandemly repeated units<sup>20</sup>. Most of the rDNA clusters in RIR17  
228 were placed on different contigs; a single copy of rDNA was found in "unitig\_311", "\_312", "\_35",  
229 "\_356", "\_4", and "\_52", and two copies were found in "unitig\_39" and "\_62" (Fig. 2b,  
230 Supplementary Table 16). In the cases where two rDNA clusters were found, the two copies resided  
231 apart from each other and did not form a tandem repeat; the distances between the clusters were over  
232 70 kb (76,187 bases in unitig\_62 and 89,986 bases in unitig\_39, Fig. 2b, Supplementary Table 16),  
233 the internal regions contained 31 and 42 protein-coding genes, respectively, and the two clusters  
234 were located on reverse strands from each other (Fig. 2a, Supplementary Table 16). Since all rDNA  
235 copies are located over 28 kb away from the edge of each contig (Fig. 2a, Supplementary Table 16),  
236 the lack of TRSs is unlikely to be an artifact derived from an assembly problem often caused by  
237 highly repetitive sequences.

238 The lack of tandem rDNA structure was also supported by mapping our PacBio reads to  
239 RIR17 and searching for rDNA on JGI\_v2.0 assemblies. BWA-MEM<sup>51</sup> mapping showed multiple  
240 PacBio reads across the 5' non-coding region, 48S rDNA and 3' non-coding regions of each rDNA  
241 contig (Fig. 3a, Supplementary Fig. 4). Because our PacBio analysis directly sequenced the DNA  
242 molecules in AMF, this syntenic structure is not due to chimeric fragments from DNA amplification  
243 but reflects the natural sequence. The 5' and 3' non-coding regions of each rDNA have sequences  
244 that are not similar other than the highly similar 5' regions on c62-1 and c62-2 (Fig. 3b and  
245 Supplementary Fig. 4), negating the possibility of mapping confusion due to sequence similarity. We  
246 reproducibly obtained the PacBio reads passing the rDNA regions from our three PacBio datasets,  
247 which had been constructed from different spore suspensions. Furthermore, our rDNA searching by  
248 RNAmmer detected a non-tandem 48S rDNA region from three JGI\_v2.0 scaffolds (Fig. 3c,  
249 Supplementary Fig. 5 and Supplementary Table 18). Although the seven rDNAs cannot be  
250 reconstructed from JGI\_v2.0, two partial rDNA sequences on JGI\_v2.0 had corresponding down- or  
251 upstream sequences that matched our RIR17 rDNAs (Supplementary Fig. 5, and Supplementary  
252 Table 18), indicating that our assembly around the rDNA genes is consistent with previous  
253 assemblies.

254 We then examined polymorphism among the 45S rDNA clusters on RIR17. rDNA  
255 heterogeneity has been reported in various AMF species, including DAOM-181602<sup>13,17,25,29</sup>.  
256 However, the distribution and degree of the variation among the rDNA paralogs were unclear.  
257 Pairwise comparisons of the ten rDNA copies detected 27.3 indels and 106.1 sequence variants with  
258 98.18% identity on average (Supplementary Tables 19 and 20), whereas the sequences of rDNA  
259 clusters at c311-1 and c52-1 were identical. Polymorphisms were distributed unevenly throughout  
260 the rDNA; percent identities were 99.91% in 18S rDNA, 97.93% in 28S rDNA, 96.65% in 5.8S  
261 rDNA, 93.45% in ITS1, and 90.28% in ITS2 (Fig. 4, Supplementary Tables 19 and 20). The number  
262 of polymorphic sites in *R. irregularis* rDNAs reached 4.07 positions per 100 bases, much higher  
263 than in other fungi, which have polymorphic sites at 0.04-1.97 positions per 100 bases (Table 2).  
264 The rDNA polymorphisms observed in RIR17 covered most of the polymorphisms previously  
265 reported in this species (Fig. 5), providing incentive to review the molecular ecology of AMF. The  
266 degree of intragenomic variation was not high enough to disrupt species-level identification but was  
267 sufficient to cause erroneous identification of *R. irregularis* strains (Fig. 5). These findings pose a  
268 caution that previous studies on geographic distribution<sup>8</sup>, species identification<sup>28</sup>, and evolutionary  
269 processes of AMF assuming rDNA homogeneity require reevaluation considering the high-level  
270 intra-genomic heterogeneity of rDNA sequences in AMFs.

271

## 272 **A model for the relaxation of rDNA homogeneity in *R. irregularis***

273 The revealed non-tandem structure of AMF rDNA led to a model for the mechanism  
274 responsible for its intragenomic heterogeneity. Pawlowska and Taylor (2004) predicted that rDNA



275 heterogeneity is caused by relaxation of "concerted rDNA evolution" in Glomerales including  
276 *Rhizophagus*<sup>25</sup>. However, details of the "relaxation" have been unclear. Here, we propose a  
277 hypothetical mechanism: the loss of TRSs precludes the presence of DNA conformations associated  
278 with rDNA amplification and the maintenance of its homogeneity. The standard model of "concerted  
279 rDNA evolution" needs two or more tandemly repeated rDNA segments because the rDNA  
280 duplicates using tandemly repeated rDNAs as binding sites and templates for replication  
281 (Supplementary Fig. 1c)<sup>52</sup>. Although non-tandem rDNAs are rare in eukaryotes, this trend of  
282 heterogeneity in non-tandem rDNAs has been detected by laboratory systems as well as in wild  
283 organisms; *Arabidopsis thaliana* has one pseudogenic rDNA (lacking 270 bases of an important  
284 helix as rRNA) besides the main tandem repeat rDNA arrays<sup>53,54</sup>, and the lack of rDNA tandem  
285 repeats in malaria-causing *Plasmodium* parasites<sup>49,55</sup> indicates intragenomic rDNA polymorphisms.  
286 These observations support our hypothesis that rDNA heterogeneity in AMF is related to their lack  
287 of TRSs. AMF species may not amplify their rDNA by the general eukaryotic rDNA amplification  
288 system (USCR), which may increase their rDNA heterogeneity.

289 On the other hand, our phylogenetic analysis suggests that AMF has a system to maintain  
290 weak similarity among the paralogs without TRSs. Previously observed rDNA heterogeneity in  
291 Glomerales suggests that concerted evolution was relaxed before the diversification of *Rhizophagus*  
292 species<sup>25,29</sup>. When the observed ten rDNAs duplicated before speciation and evolved independently,  
293 each of the duplicated genes formed a clade with orthologs in other species. However, we found no  
294 orthologous rDNA genes from other *Rhizophagus* species (Fig. 5). Our tree suggests that the  
295 observed rDNAs in *R. irregularis* either expanded or were assimilated after speciation. One  
296 hypothetical mechanism that would cause this similarity is homologous recombination via  
297 "synthesis-dependent strand annealing" (Supplementary Fig. 6)<sup>56</sup>. This conserved system to repair  
298 double-strand breaks (DSBs) results in non-crossover recombination and gene conversion wherein  
299 nonreciprocal genetic transfer occurs between two homologous sequences (Supplementary Fig. 6).  
300 Decreases in divergence by gene conversion are widely observed in duplicated genes. RIR17  
301 showed that two rDNA pairs on the same contigs (c39-1 and c39-2, c62-1 and c62-2) had higher  
302 similarity than other paralogs (Fig. 4c). This similarity may be caused by the high gene conversion  
303 rate between these loci.

304 Our model raises a new question about the mechanism that maintains the number of rDNAs  
305 without gene duplication by USCR. Even if rDNA lacks TRSs, crossover recombination and single-  
306 strand annealing delete paralogous genes. Observed inverted repeat structures between rDNAs in  
307 proximity may contribute to inhibiting "single-strand annealing" between them and prevent copy  
308 number reduction. Plastidial rDNAs of land plants also make inverted repeat structures and conserve  
309 two rDNA copies on their plastidial DNA. Another probable system is the suppression of crossover  
310 recombination by the limitations of meiosis. When Holliday junctions dissociate without crossover,  
311 DSBs are repaired without gene number reduction. The majority of these crossovers arise during  
312 meiosis in eukaryotes<sup>56</sup>, and sexual reproduction had never observed in AMF. AMF species may  
313 keep their rDNA copy number by asexual spore-making and the rarity of their meiotic cell division.

314

## 315 **RNA-level impact and probable biological significances of non-** 316 **tandemly repeated rDNAs**

317 To confirm the transcriptional activity of each rDNA, we conducted total-RNA-Seq (RNA  
318 sequencing without poly-A tail selection. See material & method section.). Illumina sequencing of a  
319 modified library for rRNA sequencing ("Rir\_rRNA\_rRNA" in Supplementary Table 2) produced  
320 18,889,290 reads (read length = 100-301 bases) from DAOM-181602. We mapped the reads to all  
321 gene models from RIR17 (43,675 protein-encoding isoforms and ten 48S rDNA paralogs) and  
322 estimated the expression levels of each gene by eXpress software<sup>57</sup>. All rDNA paralogs had over  
323 5,000 FPKMs (Fragments Per Kilobase of exon per Million mapped fragments) (Table 3), and  
324 multiple reads were matched to the specific region of each paralog, indicating that the ten rDNA

325 copies are transcriptionally active. In general, eukaryotes silence a part of the rDNA copies<sup>58</sup>, and  
326 some eukaryotes change the transcribed rRNA sequences by "RNA editing"<sup>59</sup>. These editing and  
327 silencing processes were not detected in the AMF, and the rRNA were as polymorphic as the rDNA.  
328 These results show that DAOM-181602 has multiple types of ribosomes, each containing different  
329 rRNAs. Additionally, we detected highly duplicated ribosomal protein genes (e.g., ribosomal protein  
330 S17/S11) (Supplementary Tables 6 and 21) and tRNA genes, indicating unknown amino acid  
331 isotypes, which may also account for the heterogeneity of ribosomes (Supplementary Table 22).

332 The evolutionary significance of the of non-tandemly repeated heterogeneous rDNAs is  
333 unclear. One of the probable factors is a reduction in the need to maintain numerous rDNAs in a  
334 genome. As described in the above sections, the AMF rDNA copy number suggests a system that  
335 efficiently produces rRNA from a few rDNAs, and the inverted repeats structure of rDNAs and  
336 asexual spore reproduction will also reduce the deletion rate of rDNAs. AMF may thus no longer  
337 need to rapidly amplify rDNA copies using TRSs, and the slowed replacement rate of rDNA may  
338 then cause the heterogeneity as a side effect. Another possibly significant effect is the enhancement  
339 of phenotypic plasticity by ribosomal heterogeneity (Fig. 6). Recent studies have started to reveal  
340 that various eukaryotes (e.g., yeast, mice, and *Arabidopsis*) produce heterogeneous ribosomes and  
341 subsequently alter phenotypes via proteins translated by particular ribosomes<sup>60</sup>. Accelerated  
342 accumulation of AMF rDNA mutations by the lack of TRSs may lead to functional variety in  
343 produced ribosomes and increases in the rate of adaptation by different translation activities within  
344 the same species. Although the functional effects of observed rDNA mutations remain to be  
345 determined, the middle area of our 28S rDNA (4,450-4,500 bases on c62-1) had a higher mutation  
346 rate than ITS regions (Fig. 4a). Because the ITS regions (encoding non-functional RNA) vary under  
347 neutral mutation rates, the accumulated variants in the middle-28S region may have functional  
348 effects favored by natural selection (via diversifying selection). This region is thus a useful target for  
349 the future functional analyses of AMF rRNA.

350 AMF species are similar to the malaria parasite in that they both have heterogeneous non-  
351 tandem rDNAs and infect distantly related host species<sup>49</sup>. In the malaria parasite, changes in the  
352 ribosome properties depend on the host (human or mosquito), which is likely able to alter the rate of  
353 translation, either globally or of specific messenger RNAs, thereby changing the rate of cell growth  
354 or altering patterns of cell development<sup>49</sup>. The relationship between the diversity of host organisms  
355 and rDNA polymorphisms will be an important area for further research. The phenotypic plasticity  
356 caused by heterogeneous translation machinery may allow adaptation for various host species having  
357 slightly different symbiotic systems. Previous studies have proposed that the heterokaryosity in  
358 AMF species drives variable genetic combinations of mycelia in the absence of sexual  
359 recombination<sup>61</sup>. Recent genomic studies, furthermore, discovered signatures of sexual reproduction  
360 within the dikaryon-like stage<sup>16,62</sup>. Our hypothesis does not exclude current theories for the genetic  
361 and phenotypic plasticity of AMF species (heterokaryosis and sexual reproduction) but proposes a  
362 multilayered diversification mechanism leading to their widespread distribution.  
363

## 364 **Materials and Methods**

### 365 **PacBio-based assembling**

#### 366 **DNA preparation**

367 The DNA sample for the PacBio and Illumina sequencing was extracted from a commercial  
368 strain of *R. irregularis* DAOM-181602 (MYCORISE® ASP, Premier Tech Biotechnologies,  
369 Canada). The DNA extraction followed the method of Fulton et al., 1995<sup>63</sup> with some modifications  
370 described below. Purchased spore suspensions (including approximately 1,000,000 spores) were  
371 centrifuged (4500 rpm, 20 min), and washed three times with distilled water. Precipitated spores  
372 were frozen with liquid nitrogen, ground with pestle, and dispersed in extraction buffer (100 mM  
373 Tris-HCl pH 8.0, 20 mM EDTA, 0.75% sarkosyl, 0.1% PVP, 0.75% cetyl trimethylammonium  
374 bromide (CTAB), 0.13 M sorbitol, 0.75 M NaCl, and 0.1 mg/ml proteinase K). After incubation at  
375 37 °C for 10 min, the aqueous phase was centrifuged (15000 rpm, 4 min), and the pellet was  
376 discarded. An equal volume of phenol/chloroform (1:1, vol/vol) was added, and the sample was  
377 gently mixed and centrifuged (15000 rpm, 2 min). The aqueous phase was collected, and an equal  
378 volume of chloroform was added to the sample, which was then mixed and centrifuged (15000 rpm,  
379 2 min). The aqueous phase was collected again, and 1/10 vol of sodium acetate and 0.7 vol of  
380 isopropanol were added. The sample was then mixed and centrifuged (12000 rpm, 20 min). The  
381 resulting pellet was washed twice with 70% EtOH and eluted with TE buffer. Extracted DNA was  
382 purified with Genomic-tip (Qiagen, Germany) following the manufacturer's instructions.

#### 383 **PacBio sequencing**

384 Long-read sequences were generated with a PacBio RS II sequencer (Pacific Biosciences,  
385 Menlo Park, CA, USA) using a DNA/Polymerase Binding Kit P6 v2 (Pacific Biosciences) and a  
386 DNA Sequencing Reagent Kit 4.0 (Pacific Biosciences). The library was prepared according to the  
387 20-kb Template Preparation Using BluePippin™ Size-Selection System (Sage Science, MA, USA).  
388 A total sequence of 11.7 Gb in 955,841 reads (76× coverage of the genome, assuming a genome size  
389 of 154 Mb) was obtained from 29 SMRT cells (Supplementary Table 2). The N50 length of the raw  
390 reads was 13,107 bases.

#### 391 **PacBio-based genome assembly**

392 The *R. irregularis* genome was assembled using the RS\_HGAP\_Assembly.3 protocol for  
393 assembly and Quiver for genome polishing in SMRT Analysis v2.3.0 (Pacific Biosciences). The  
394 procedure consisted of three parts, involving (1) generation of preassembled reads with improved  
395 consensus accuracy; (2) assembly of the genome through overlap consensus accuracy using Celera  
396 Assembler; and (3) one round of genome polishing with Quiver. For HGAP, the following  
397 parameters were used: PreAssembler Filter v1 (minimum subread length = 500 bases, minimum  
398 polymerase read quality = 0.80, minimum polymerase read length = 100 bases); PreAssembler v2  
399 (minimum seed length = 6,000 bases, number of seed read chunks = 6, alignment candidates per  
400 chunk = 10, total alignment candidates = 24, minimum coverage for correction = 6, and BLASR  
401 options = 'noSplitSubreads, minReadLength = 200, maxScore = 1,000, and maxLCPLength = 16');  
402 AssembleUnitig v1 (genome size = 150 Mb, target coverage = 25, overlapper error rate = 0.06,  
403 overlapper min length = 40 bases and overlapper k-mer = 14); and BLASR v1 mapping of reads for  
404 genome polishing with Quiver (maximum divergence = 30, minimum anchor size = 12). Assembly  
405 polishing with PacBio reads was carried out with Quiver using only unambiguously mapped reads.  
406 The statistics of the PacBio-only assembly set and previously sequenced data (Lin14, JGI\_v1.0,  
407 JGI\_v2.0) were evaluated using QUASt ver. 4.3<sup>64</sup>. The percentage of genome coverage was  
408 estimated assuming the genome size to be 154 Mb based on Tisserant et al<sup>17</sup>.

## 409 **Error correction with HiSeq data and identification of host plant contamination**

410 After polishing using Illumina data, we eliminated the sequences derived from contaminated  
411 DNAs during the sample preparation. BLASTn search of the polished assemblies against the  
412 “refseq\_genomic” database detected nine assemblies showing similarity with sequences from carrot  
413 (BLAST ver. 2.2.31+, query coverage per subject >95%, percentages of identical matches >90%, bit  
414 score > 1000) (Supplementary Table 2), which might be used as a host plant by the manufacturer for  
415 the cultivation of *R. irregularis* samples. After elimination of the nine contaminated contigs, we  
416 submitted the assemblies to the DDBJ as whole-genome shotgun sequence data (RIR17) of *R.*  
417 *irregularis* DAOM-181602 (BDIQ01).

## 418 **Genomic alignment with previous genome assemblies**

419 The quality of our genome assembly was evaluated by alignment with previously available *R.*  
420 *irregularis* DAOM-181602 genome assemblies. A one-by-one genome alignment was constructed  
421 by MUMmer ver. 4.0.0beta2<sup>65</sup> between RIR17, JGI\_v2.0, Lin14, and JGI\_v1.0 assemblies. Each  
422 genome set was aligned by the nucmer function in MUMmer, and the statistics of the alignments  
423 were extracted by the dnadiff wrapper with the default setting.  
424

## 425 **Gene prediction and annotation**

426 *De novo* repeat motifs were identified using RepeatModeler ver. 1.0.8, which combines  
427 RECON and RepeatScout programs<sup>37</sup>. Based on the identified motif, the repetitive region in the  
428 assemblies was masked with RepeatMasker ver. 4.0.5<sup>37</sup>. We used the default parameters for the  
429 identification and the masking.

430 For the gene models constructed from RIR17 assemblies, standard RNA-Seq data were  
431 obtained from *R. irregularis* spores and hyphae. The RNA was extracted with an RNeasy Plant Mini  
432 kit (Qiagen) after incubation of the purchased spores (MYCORISE® ASP) in a minimum nutrient  
433 medium for one day. An Illumina RNA-Seq library was constructed with a TruSeq Stranded mRNA  
434 Library prep kit (Illumina). The library was sequenced (101 bases from each end) on a HiSeq 1500  
435 platform (Illumina). A total of 16,122,964 raw reads (3.2 Gb) were obtained from the library  
436 (Supplementary Table 2). After filtering low-quality and adapter sequences, RNA-Seq data were  
437 mapped to RIR17 assemblies with TopHat ver. 2.1.1<sup>66</sup> with the default setting.

438 Then, the RIR17 assemblies were processed through the RNA-Seq-based gene model  
439 construction pipeline using AUGUSTUS ver. 3.2.1 software<sup>67</sup>. We constructed *R. irregularis*-  
440 specific probabilistic models of the gene structure based on 495 manually constructed gene models  
441 from the longest “unitig\_392” sequence in RIR17. Manual gene models were made with *ab initio*  
442 AUGUSTUS analysis based on probabilistic models for *Rhizopus oryzae* and by manual refinement  
443 using the homology data with already-known genes and mapped RNA-Seq data. Then, with the  
444 trained probabilistic models and the intron-hints data from the mapped RNA-Seq read, 37,639  
445 optimal gene models were constructed using the AUGUSTUS pipeline. We then confirmed whether  
446 the AUGUSTUS pipeline overlooked the called genes in previous genome studies. We mapped all  
447 transcript sequences obtained from previous gene modeling on Lin14 and JGI\_v1.0 against our  
448 RIR17 genomic sequences with Exonerate<sup>68</sup> (ver. 2.2.0, option --model est2genome --bestn 1),  
449 resulting in the recruitment of 3,933 overlooked genes. The completeness of the constructed gene  
450 model was evaluated with BUSCO ver. 2.0<sup>39</sup>. The BUSCO analysis used the “Fungi odb9” gene set  
451 (<http://buscodev.ezlab.org/datasets/fungiodb9.tar.gz>) as a benchmark and employed the “-m  
452 proteins” option to analyze the preconstructed protein data without the *ab initio* gene modeling step.

453 The confidences of the obtained 41,572 gene models were estimated based on 1) RNA-Seq  
454 expression support, 2) homology evidence, and 3) protein motif evidence. For the calculation of

455 gene expression levels, we mapped our "Rir\_RNA\_SS" data and 32 RNA-Seq data submitted to the  
456 sequence read archive (SRA) database (24 data sets from DRP002784 and 8 data sets from  
457 DRP003319) and calculated the gene expression levels (FPKM) using FeatureCounts<sup>69</sup> with the  
458 default setting (Supplementary Table 6). Homology with previously known genes was determined  
459 by BLAST searches against the orthoDB (odb9) (Supplementary Tables 6 and 21). The protein motif  
460 was searched using Pfam analysis in InterProScan ver. 5.23-62.0<sup>70</sup> (Supplementary Table 6).

461 Constructed gene models were annotated by several *in-silico* searches. Gene functions were  
462 predicted based on BLASTp (Database = nr, RefSeq and UniProt), and Pfam in InterProScan  
463 (Supplementary Table 6). We manually selected the descriptive nomenclatures from those four  
464 searches and submitted to the DDBJ. Orthologous relationships were classified with Orthofinder  
465 (ver. 1.1.2)<sup>71</sup>, and rapidly expanded/contracted families were analyzed with CAFE (ver. 4.1)<sup>72</sup> from  
466 Orthofinder results. Phylogenetic trees for the CAFE analysis were constructed with IQ-tree (ver.  
467 1.6.1)<sup>73</sup> for maximum likelihood (ML) analysis and r8s (v1.81) for a conversion for an ultrametric  
468 tree. An ML tree was made from 159 single-copy genes from the Orthofinder results (Supplementary  
469 Table 6) and was converted to an ultrametric tree based on the divergence times of AMF-  
470 Mortierellales (460 Myr)<sup>27</sup> and Deuterostomia-Protostomia (550 Myr)<sup>74</sup>. Overlapping genes with  
471 TEs were extracted from AUGUSTUS and RepeatMasker results using bedtools (ver. 2.26.0,  
472 "bedtools intersect" with -wa option)<sup>75</sup>.

473 The MACG (missing ascomycete core gene) orthologs were sought using BLAST with the "-  
474 evaluate 0.0001" option, and the reference sequences for the MACG search were selected from protein  
475 data from an S288C reference in the *Saccharomyces* genome data base (SGD) (Supplementary Table  
476 15). Genes involved in the degradation of plant cell walls were sought by BLAST with the same  
477 settings as the MACG search, and the reference sequences were selected from *Aspergillus niger*  
478 CBS 513.88 data in GenBank based on CAZY classification (Supplementary Table 15). Other gene  
479 annotations based on the CAZY database were performed with the dbCAN HMMs 6.0 web service<sup>76</sup>  
480 (Supplementary Table 6).

481

## 482 **Detection of Ribosomal DNA and intragenomic** 483 **polymorphisms**

484 Ribosomal DNA regions were detected by RNAmmer ver. 1.2<sup>77</sup> from whole RIR17  
485 assemblies and were manually refined based on the MAFFT v7.294b<sup>78</sup> alignment to the 48S rRNA  
486 in *Saccharomyces cerevisiae* S288C. The genomic positions of rDNAs were visualized with Python  
487 ver. 3.4.0 (BasicChromosome ver. 1.68, and GenomeDiagram ver. 0.2 modules) (Fig. 2a).

488 The number of rDNA paralogs in the genome was estimated by mean depth of coverage. We  
489 masked repetitive regions (based on RepeatModeler analysis) and all rDNA regions on RIR17  
490 except one rDNA copy (c62-1). Then, trimmed R1 Illumina reads from "Rir\_DNA\_PE180" library  
491 were mapped to the repeat-masked RIR17 using bowtie2 ver. 2.2.9<sup>79</sup>. The coverage depth of the  
492 rDNA region and 243 single-copy BUSCOs were obtained using bedtools ("bedtools coverage"  
493 command with -d option), and the statistics of each region were calculated and visualized by R  
494 software ver. 3.4.2 with the ggplot2 library (Fig. 2b). To prevent copy number estimation from depth  
495 fluctuation due to the intragenomic heterogeneity, we confirmed the coverage depth using the  
496 consensus sequences of all ten rDNA paralogs; the joined Illumina reads (from "Rir\_DNA\_PE180"  
497 library) were mapped back to a consensus rDNA sequences and ten single-copy BUSCO genes from  
498 RIR17, and the depth of coverages was then counted by bedtools (genomeCoverageBed)  
499 (Supplementary Table 17).

500 The syntenic structure around rDNA genes was confirmed by the mapping of PacBio raw  
501 reads and comparison with JGI\_v2.0 assemblies. All of the "filtered-subreads" from SMART  
502 Analysis software were mapped to RIR17 assemblies by BWA-MEM (ver. 0.7.15-r1140) with the "-  
503 x pacbio" option. Mapped reads were visualized with Integrative Genomics Viewer (ver. 2.4), and  
504 the reads covering the rDNA regions were selected by eye. Alignment between JGI\_v2.0 and RIR17  
505 was done by a combination of MUMmer, LASTz (ver. 1.04.00), and AliTV<sup>80</sup> (ver. 1.0.4) software.  
506 JGI\_v2.0 scaffolds having regions corresponding with RIR17 sequences were selected by the  
507 nucmer and delta-filter (with -1 option) functions in MUMmer. Then, we extracted the JGI\_v2.0  
508 scaffolds corresponding to RIR17 contigs with rDNAs ("unitig\_311", "\_312", "\_35", "\_356", "\_4",  
509 and "\_52"). Selected scaffolds were aligned to the corresponding RIR17 contigs by alitv.pl scripts  
510 (with "alignment: program: lastz" and "--ambiguous=n" settings) and alitv-filter.pl (with "--min-link-  
511 identity 80" and "--min-link-length 10000" option) in the AliTV package and visualized with the  
512 AliTV web service (<http://alitvteam.github.io/AliTV/d3/AliTV.html>).

513 The difference among the rDNA paralogs was calculated from the aligned sequences by  
514 MAFFT ver. 7.309 (options: --localpair, --op 5, --ep 3, --maxiterate 1000) using the pairwise  
515 comparison with CLC Main Workbench 7.8.1 (Qiagen). The mutation type was called by eye from  
516 the alignment, and we chose the c62-1 paralog as a reference sequence for mutation calling (Fig. 4a).  
517 Phylogenetic trees (Figs. 4c and 5) were constructed from the MAFFT alignment by the neighbor-  
518 joining method with MEGA<sup>81</sup> ver. 7.0.21 under the maximum composite likelihood model and were  
519 tested for robustness by bootstrapping (500 pseudoreplicates).  
520

## 521 Heterogeneity of translation machineries

522 The expression levels of the rDNA paralogs were examined with modified Illumina  
523 sequencing of *R. irregularis* spores and hyphae. Total RNA was extracted with an RNeasy Plant  
524 Mini kit (Qiagen) after the incubation of the MYCORISE® spores in a minimum nutrient medium  
525 for seven days. An Illumina RNA-Seq library was constructed with a TruSeq Stranded mRNA  
526 Library prep kit (Illumina). To skip the poly-A tailing selection step in the library construction, we  
527 started from the "fragmentation step" of the standard manufacturer's instructions. The library was  
528 sequenced (301 bases from each end) on a MiSeq platform (Illumina). A total of 16,122,964 raw  
529 reads (3.2 Gb) were obtained from the library (Supplementary Table 2). After filtering low-quality  
530 and adapter sequences, RNA-seq data were mapped to the RIR17 assembly with TopHat with the  
531 default settings. Fragments Per Kilobase of exon per Million mapped fragments (FPKM) for each  
532 gene were calculated with eXpress ver. 1.5.1 with the "--no-bias-correct" option. Transfer RNAs  
533 were identified with tRNAscan-SE<sup>82</sup> ver. 1.3.1.  
534

## 535 Data Availability

536 Raw reads, genome assemblies, and annotations were deposited at INSDC under the  
537 accessions as follows; Sequence read archive: DRA004849, DRA004878, DRA004889,  
538 DRA004835, DRA005204, and DRA006039; Whole genome assembly: BDIQ01000001-  
539 BDIQ01000210; Annotations: GBC10881-GBC54553. All the other data generated or analyzed  
540 during this study are included in this published article and its Supplementary information.  
541  
542

543

## 544 **Author contributions**

545 T.M., S.S., M.K., conceived of and designed the experiments; T.M., Y.K., H.K., N.T., K.Y., and  
546 T.B. performed the experiments; T.M., N.O., S.S., and T.B. analyzed the data, T.M., Y.K., H.K.,  
547 K.Y., T.B., S.S., and M.K. wrote the manuscript.

548

## 549 **Acknowledgements**

550 This work was supported by JST ACCEL Grant Number JPMJAC1403, Japan. We thank the  
551 "Functional Genomics Facility" and the "Data Integration and Analysis Facility" at the National  
552 Institute for Basic Biology for technical support; Katsuharu Saito, Kohki Akiyama, and two  
553 anonymous reviewers for discussions; and present and past members of the Kawaguchi lab and the  
554 Shigenobu lab.

555

## 556 **Competing Interests**

557 The authors declare no conflicts of interest associated with this manuscript.

558

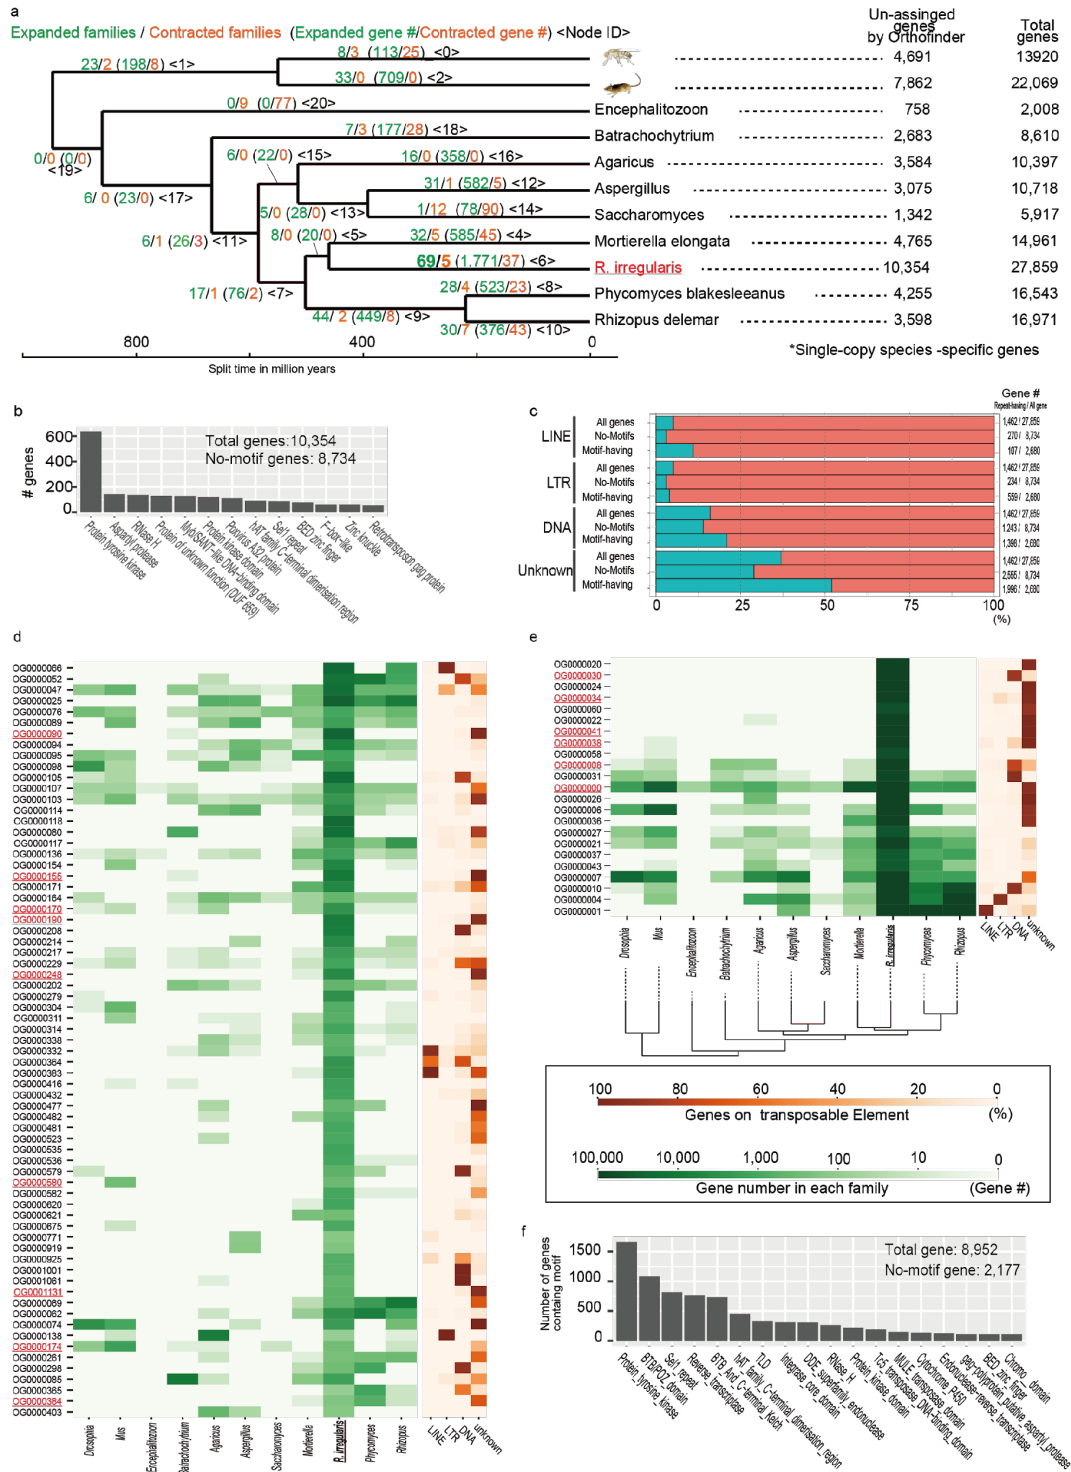

**Fig. 1 Gene inflation in *R. irregularis***

**a. Rapidly expanded/contracted ortholog groups based on CAFE analysis.** Total gene number of analyzed species and unassigned genes by Orthofinder analysis (species-specific single-copy genes) are described on the right side of the tree. **b. The number of *R. irregularis*-specific single-copy genes having protein motifs.** Minor motifs (<50 genes) were omitted from the Fig. (raw-data; Supplementary Table 12). **c. The proportion of genes among the SSSC genes having each repeat element.** **d. Sixty-nine rapidly expanded orthologous groups (OGs).** Green heat map shows the number of genes in each OG. Orange heat map indicates the proportion of genes with each repeat element. The OGs containing the "protein tyrosine kinase" domain are marked in red. **e. Rapidly expanded OGs based on z-score analysis.** The colors have the same meaning as in 1d. **f. The number of rapidly expanded ortholog genes having protein motifs.** Minor motifs (<100 genes) are omitted from the Fig. (raw-data; Supplementary Table 12).

559  
560  
561  
562  
563  
564  
565  
566  
567  
568  
569  
570  
571



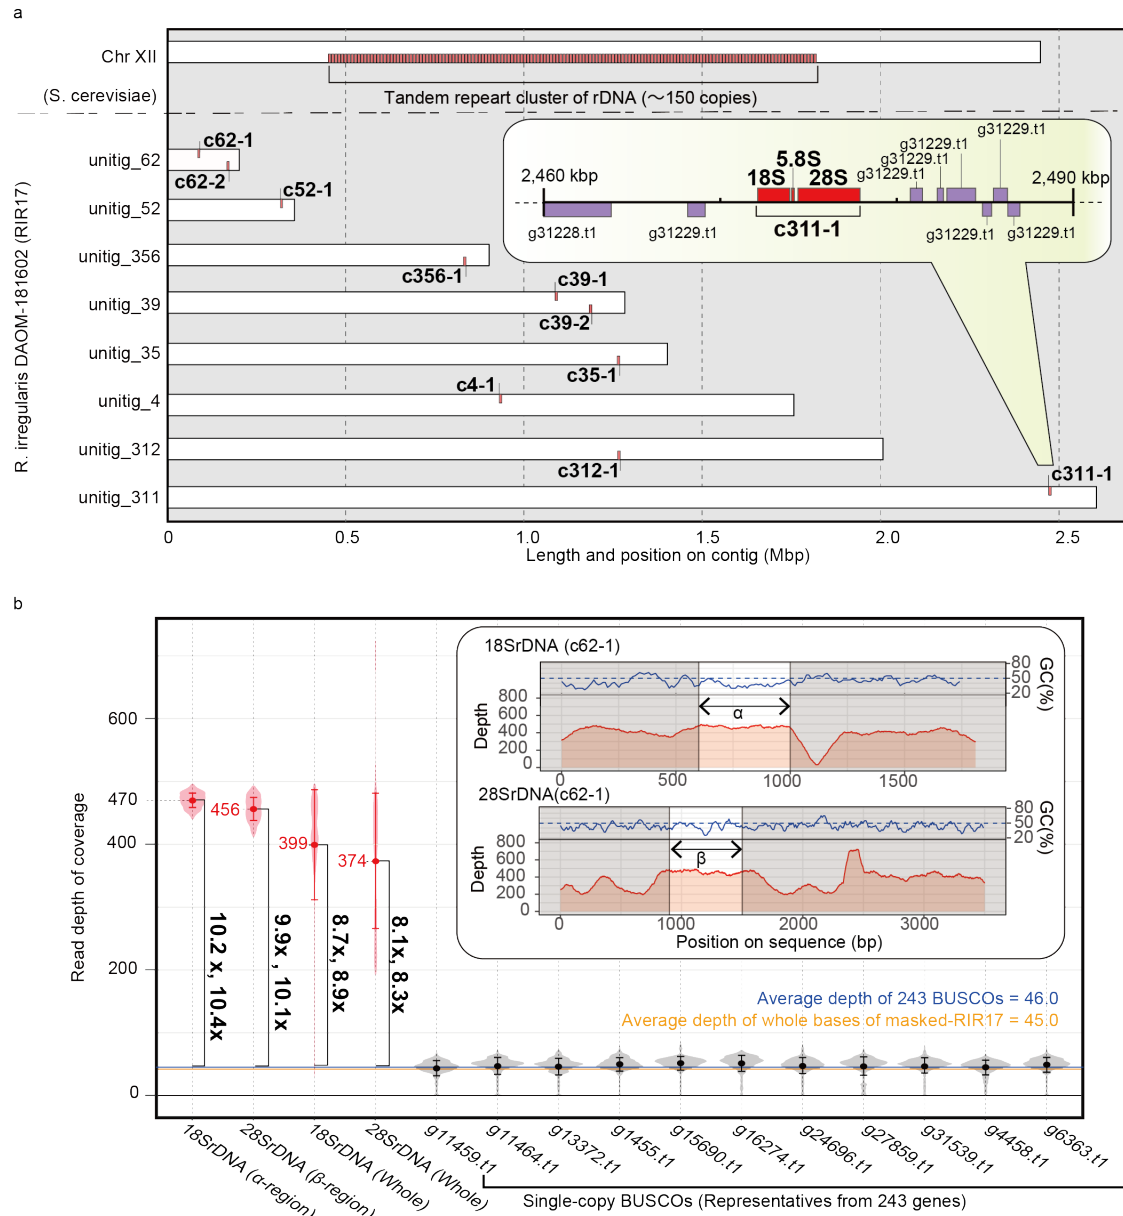

**Fig. 2 Physical maps of rDNA structures and copy numbers in RIR17**

**a.** Distribution of *R. irregularis* rDNA units in the genome. Each 48S rDNA unit is represented as a red box. For comparison, rDNA clusters on *Saccharomyces cerevisiae* chromosome XII are shown<sup>83,84</sup>. Inset is a magnified view of a 48S rDNA unit (c311-1) with nearby protein-encoding genes (purple boxes). Genes encoded by the plus-strand genome are depicted on the top side, and those encoded by the minus strand are shown on the bottom side. **b.** Copy number of rDNA in DAOM-181602 based on the read depth of coverage. Averages of the “read depth of coverage” are represented as dots and with italic labels. Error bars and violin plots show standard deviations and normalized coverage distribution. The depths of rDNA regions are marked in red. For comparison, the data from representative single-copy BUSCO genes on RIR17 are shown in black. The mean depth of means from 243 BUSCOs is marked with a horizontal blue line, and the mean depth of all RIR17 bases is marked with an orange line. The changes in the depth of rDNA regions are in vertical bold labels and square brackets. rDNA regions adapted for the copy number estimation ( $\alpha$ - and  $\beta$ -regions) are marked in the inset with the depth of coverage and the GC content of each sequence position.

572  
573  
574  
575  
576  
577  
578  
579  
580  
581  
582  
583  
584  
585  
586

587

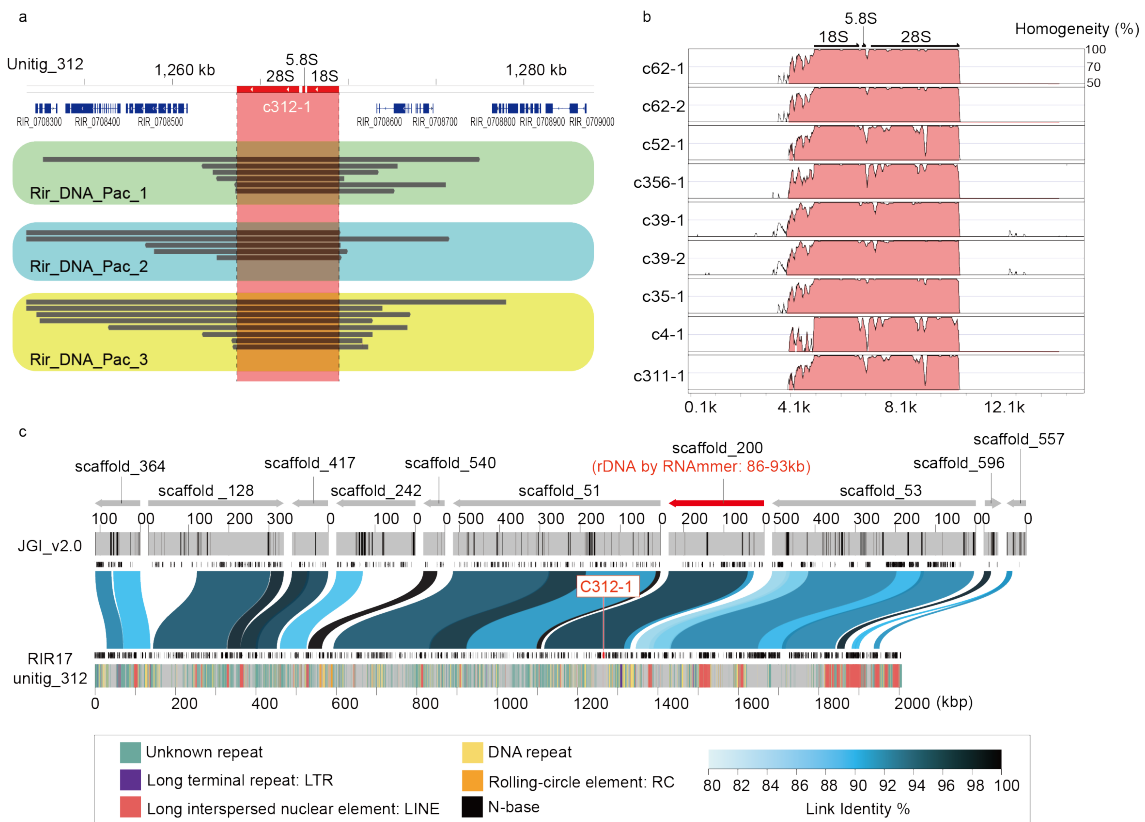

588  
589  
590  
591  
592  
593  
594  
595  
596  
597  
598  
599  
600  
601  
602  
603  
604  
605  
606

### Fig. 3 Evidence for the lacking of tandem repeat structures of rDNA

**a. Mapped PacBio read for the rDNA regions on unitig\_312 contig in RIR17.** The top bar and tick marks indicate sequence positions on the contig. The rDNA region (c312-1) is indicated in red. Blue boxes show the predicted protein-coding genes. The mapped read was indicated black bar, and reads from different DNA samples and libraries (Supplementary Table 2) boxed with green, light-blue and yellow colors, in each. Mapped reads for the other rDNA regions were summarized in Supplementary Fig. 4. **b. Sequence similarity of c312-1 rDNAs with other rDNA regions on RIR17.** The 5 kb upstream and downstream sequences of each rDNA region are separated from each contig. Alignment and similarity were calculated with mVISTA<sup>85</sup>. Red color shows the sequence regions with similarity over the threshold (>70% similarity for 100b). **c. Positions and identities of JGI\_v2.0 scaffold aligned against unitig\_312 contigs of RIR17.** The top area indicates aligned scaffolds and their strands. A scaffold containing the predicted rDNA gene is marked in red. The positions of N-base on JGI\_v2.0 are marked with black bars in the next line. Predicted protein-coding genes from Chen et al<sup>14</sup>. are indicated with the next black boxes. Aligned positions and their similarity are marked with blue or black bands on the next line. The area below the black boxes show the predicted genes in the present study. Repetitive regions are marked with colored lines on the bottom band. Types of repetitive elements and the legend of similarity coloration are indicated in the bottom box.

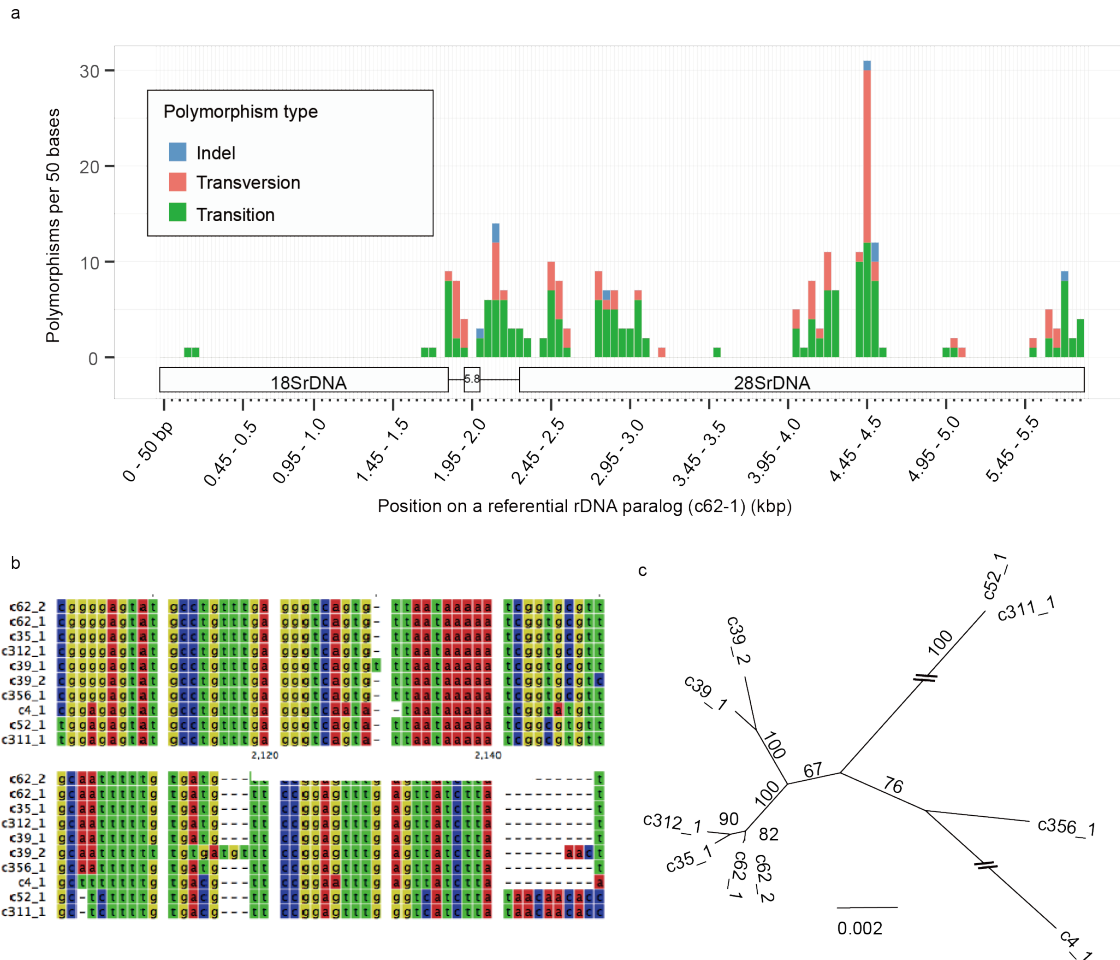

607  
608  
609  
610  
611  
612  
613  
614  
615  
616  
617  
618  
619

**Fig. 4 Polymorphisms of 48S rDNA paralogs in RIR17**

**a.** The distribution of rDNA sequence variants within the 48S rDNA of RIR17. The position and types of polymorphisms were called based on the paralog c62-1. **b.** Alignment of a heterogeneous region among the 48S rDNA paralogs. Partial sequences of MAFFT-aligned 48S rDNAs (corresponding to 2,049-2,136 bases positions on c62-1). **c.** Neighbor-joining tree for phylogenetic relationships among the ten rDNA paralogs based on 5,847 aligned positions. Bootstrap values are described at each node.

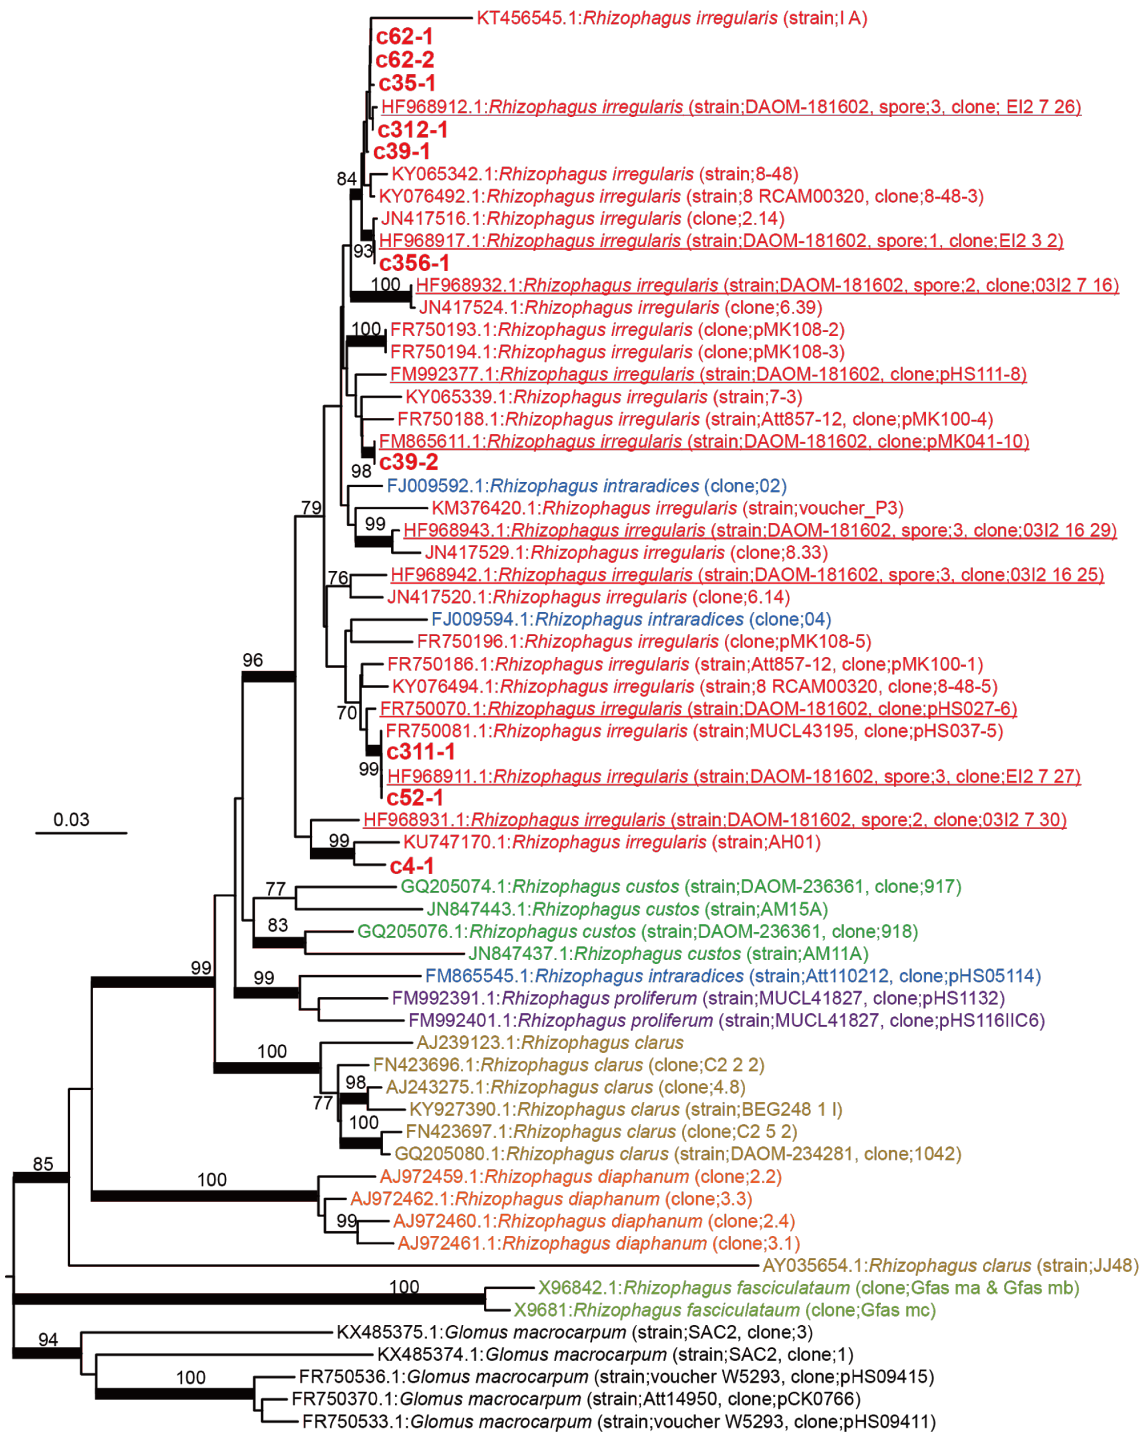

620

621 **Fig. 5 NJ tree based on 586 positions of 48S rDNA.**

622 Partial 18S, ITS1, 5.8S, ITS2 and partial 28S rDNAs were used. The ten rDNA paralogs from RIR17 and 58  
623 *Rhizophagus* sequences from the DDBJ were chosen as operational taxonomic units (OTUs). The 58 *Rhizophagus*  
624 sequences were selected from 329 OTUs in the DDBJ (209 OTUs for DAOM-181602, 57 OTUs for other *R.*  
625 *irregularis* strains, and 63 OTUs for other *Rhizophagus* species) using CD-Hit clustering (-c 0.98 -n 5). Five *Glomus*  
626 sequences were used as outgroup OTUs. Red underlined OTUs are sequences from *R. irregularis* DAOM-181602,  
627 and other red OTUs are data from other strains of *R. irregularis*. Nodes supported by over 80 bootstrap values are  
628 marked by a bold line. All *R. irregularis* OTUs made a single clade with *Rhizophagus intraradices* that is a  
629 morphologically non-distinct sister group of *R. irregularis*.

630

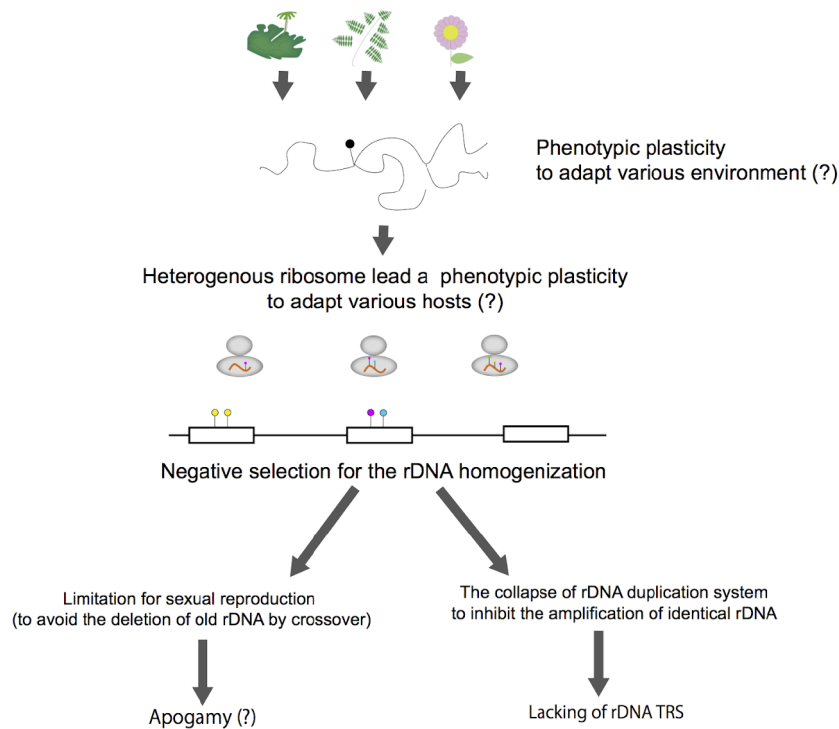

631  
632  
633  
634  
635  
636  
637  
638  
639

**Fig. 6 Hypothetical model for the evolution of unique rDNAs/rRNAs in AMF**

Evolutionary model for the lack of TRSs in AMF and its sequence heterogeneity. The various environmental conditions (e.g., various host species) may lead to the evolution of phenotypic plasticity via multiple types of ribosomes in AMF. If the rDNA is exposed to disruptive selection, rDNA duplication by TRSs and USCR may be nonadaptive because the duplication of particular rDNA types reduces the variety of rDNA types. Sexual reproduction, combined with crossover recombination, may also be limited to inhibit the reduction of mutated rDNA.

640 **Table 1 Assembly statistics of *R. irregularis* genome**  
641

|                                                     | RIR17                   |
|-----------------------------------------------------|-------------------------|
| Accession number                                    | BDIQ01000000            |
| Predicted genome size by flow cytometry             | 154 Mb                  |
| Total length of contigs (% of genome)               | 149,750,837 bases (97%) |
| # contigs                                           | 210                     |
| # N bases                                           | 0                       |
| Longest contig (bp)                                 | 5,727,599               |
| Contig N50 (bases)                                  | 2,308,146               |
| L50                                                 | 23                      |
| GC %                                                | 27.9%                   |
| CEGMA completeness for genome contigs               | 98.4%                   |
| # of predicted genes                                | 41,572                  |
| BUSCO completeness for gene models (DB; fungi_odb9) | 94.1% (273/290)         |
| Complete single copy                                | 83.8% (243/290)         |
| Complete duplicated                                 | 10.3% (30/290)          |
| Fragmented                                          | 3.8% (11/290)           |
| Missing                                             | 2.1% (6/290)            |

642  
643  
644

645 **Table 2 Numbers of intragenomic polymorphic sites in fungal rDNAs**

| Species                                              | #<br>polymorphic<br>sites | Repeat unit<br>length (bp) | # of units<br>in genome | # of polymorphic<br>sites/100 bases |
|------------------------------------------------------|---------------------------|----------------------------|-------------------------|-------------------------------------|
| <i>Rhizophagus irregularis</i>                       | 238                       | 5847                       | 10                      | 4.07                                |
| <i>Rhizophagus irregularis</i> <sup>13</sup>         | 38                        | 1563                       | -                       | 2.43                                |
| <i>Ashbya gossypii</i> <sup>30</sup>                 | 3                         | 8147                       | 50                      | 0.04                                |
| <i>Saccharomyces paradoxus</i> <sup>30</sup>         | 13                        | 9103                       | 180                     | 0.14                                |
| <i>Saccharomyces cerevisiae</i> <sup>30</sup>        | 4                         | 9081                       | 150                     | 0.04                                |
| <i>Aspergillus nidulans</i> <sup>30</sup>            | 11                        | 7651                       | 45                      | 0.14                                |
| <i>Cryptococcus neoformans</i> <sup>30</sup>         | 37                        | 8082                       | 55                      | 0.46                                |
| <i>Phoma exigua</i> var. <i>exigua</i> <sup>86</sup> | 27                        | 1672                       | -                       | 1.61                                |
| <i>Mycosphaerella punctiformis</i> <sup>86</sup>     | 26                        | 1669                       | -                       | 1.56                                |
| <i>Teratosphaeria microspora</i> <sup>86</sup>       | 16                        | 1671                       | -                       | 0.96                                |
| <i>Davidiella tassiana</i> <sup>86</sup>             | 33                        | 1672                       | -                       | 1.97                                |

646

647

648

649

650  
651





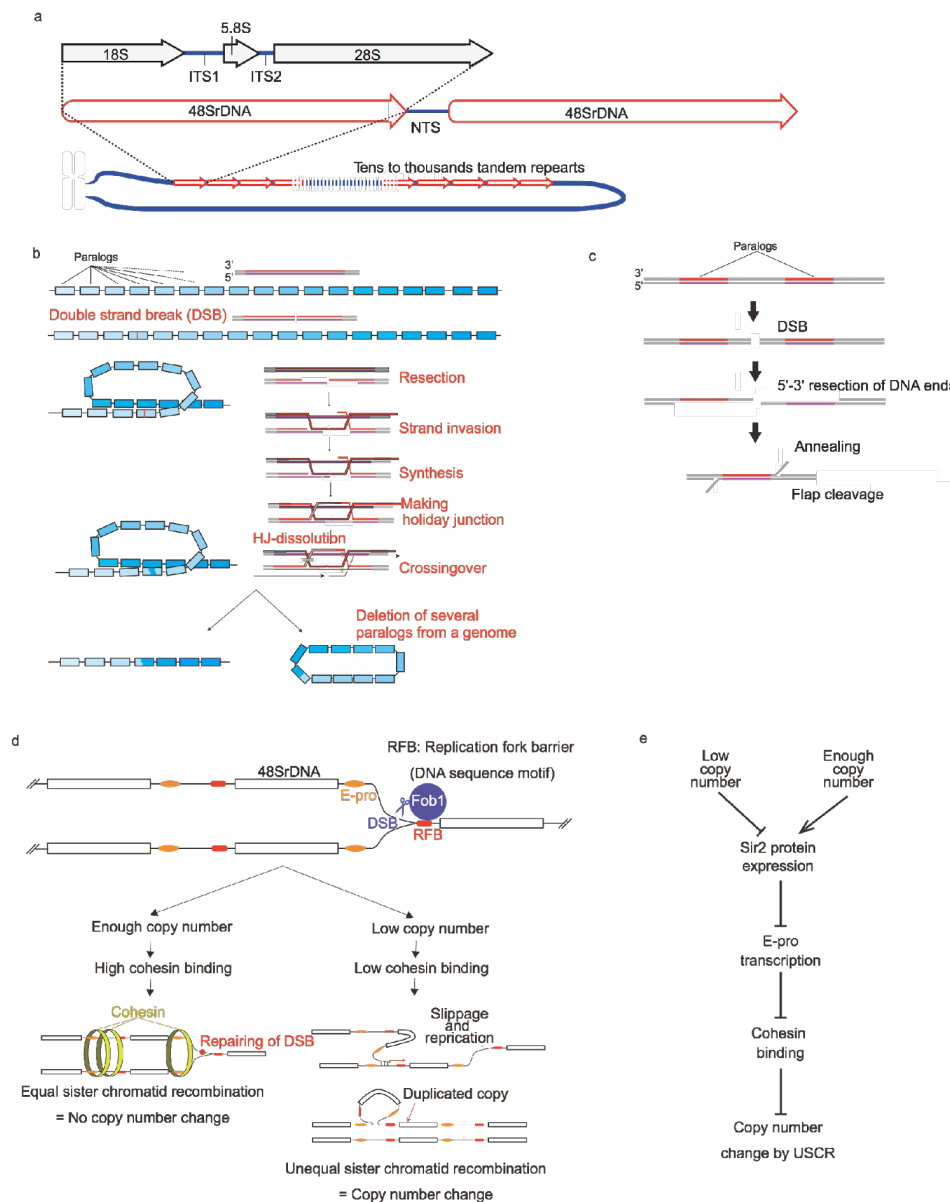

653  
654  
655  
656  
657  
658

### Supplementary Fig. 1 General concerted evolution of eukaryotic rDNA

a. A general structure of eukaryotic rDNA clusters<sup>20</sup>. b. Deletion of homologous genes by crossover recombination<sup>33,56</sup>. c. Deletion of homologous genes by single-strand annealing<sup>34</sup>. d. A model of the rDNA number maintenance system<sup>32</sup>. e. Copy number-controlling pathway in yeast<sup>32</sup>.

Gene models without "Provisional" models

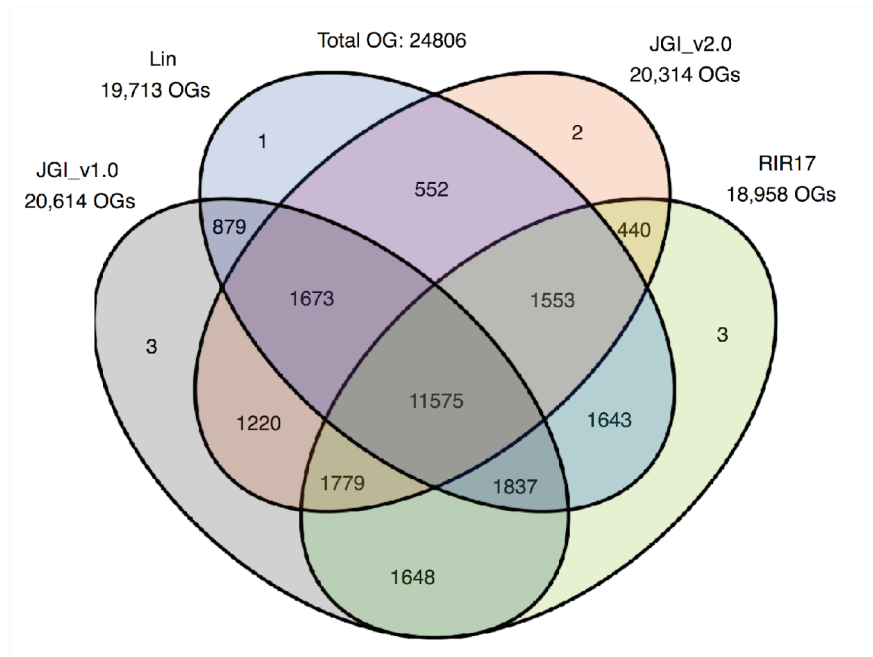

All gene models including "Provisional" models

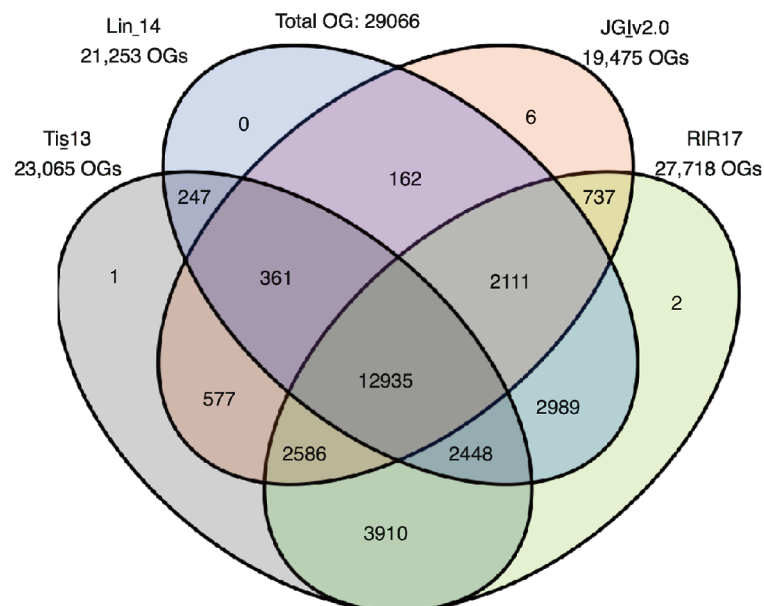

659  
660  
661  
662

**Supplementary Fig. 2 Cross comparison of *R. irregularis* DAOM-18160219 orthologous genes from three genomic studies and our RIR17 assemblies.**

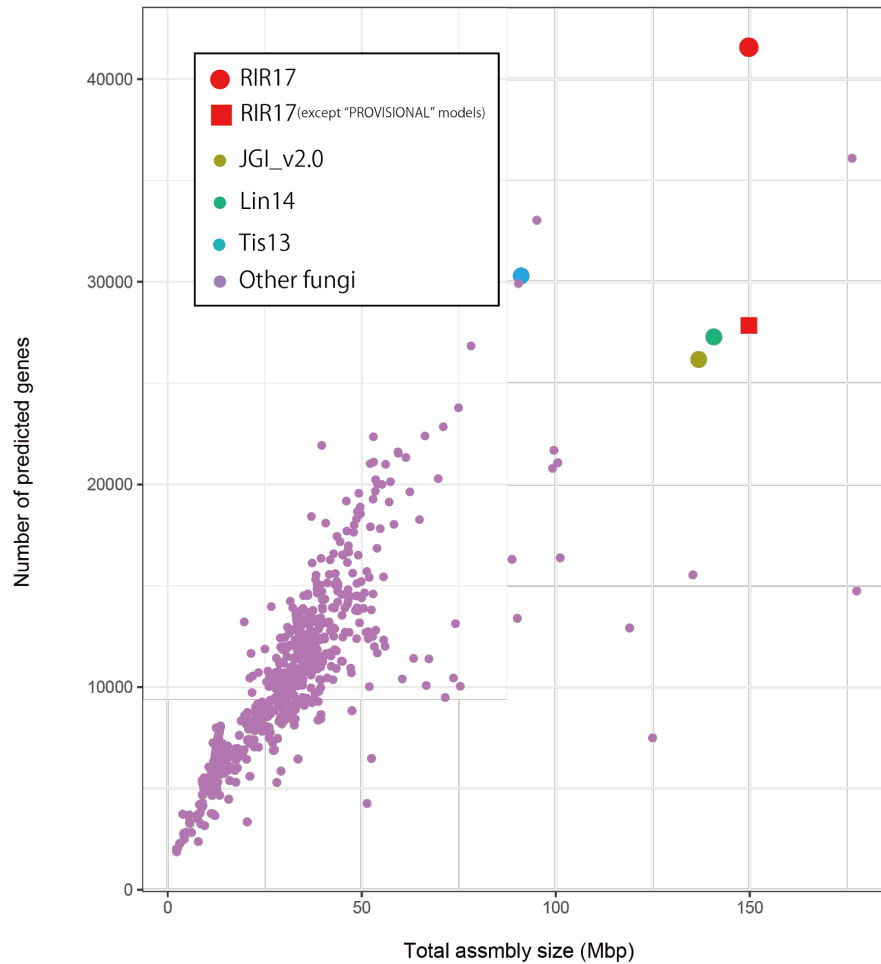

663

664 **Supplementary Fig. 3 Total assembly size and predicted gene number in fungi.**

665 *Rhizophagus irregularis* genomes (RIR17 (this work) and two previously assembled genomes, JGI\_v1.0 and Lin14)  
666 and 768 genomes registered in GenBank. The fungal assembly statistics were obtained from the registered  
667 information in GenBank ([ftp://ftp.ncbi.nlm.nih.gov/genomes/ASSEMBLY\\_REPORTS/All/](ftp://ftp.ncbi.nlm.nih.gov/genomes/ASSEMBLY_REPORTS/All/)).

668

669

670

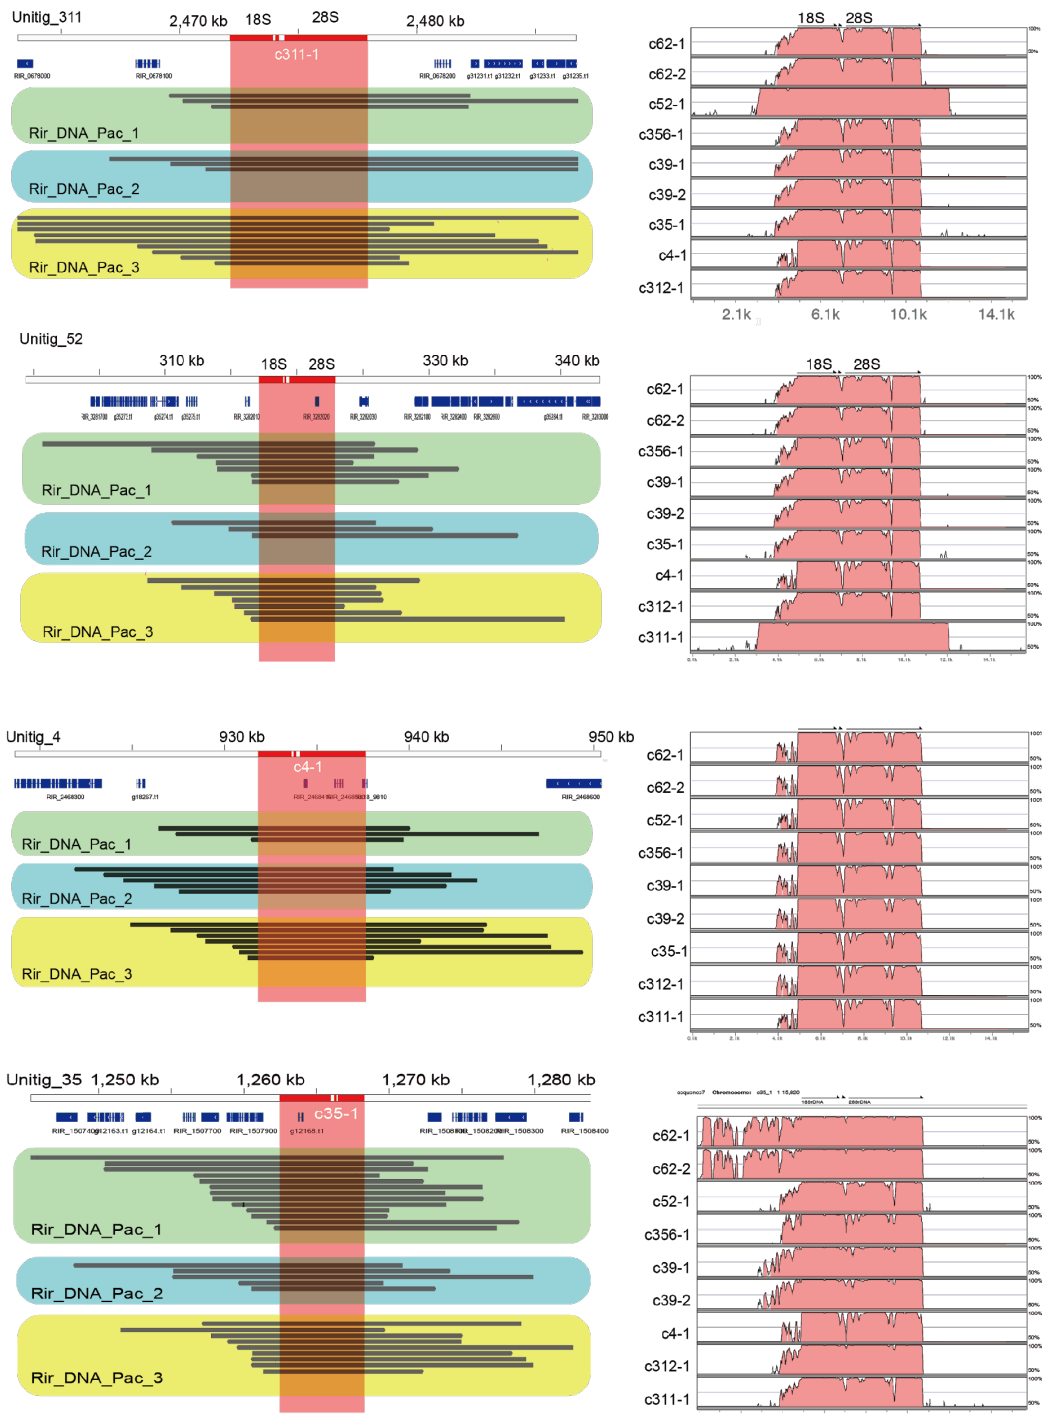

671  
672

(Continued)

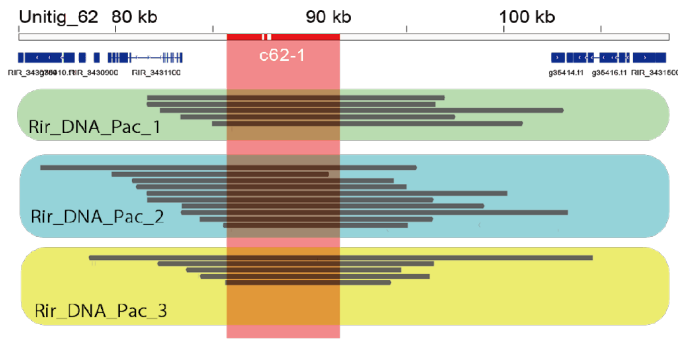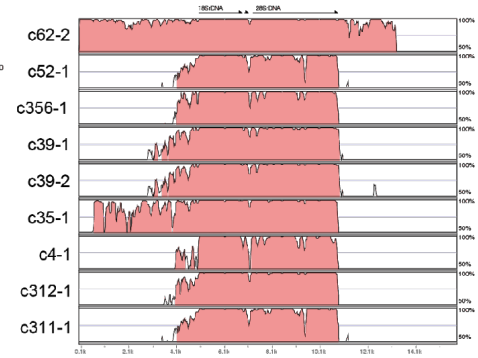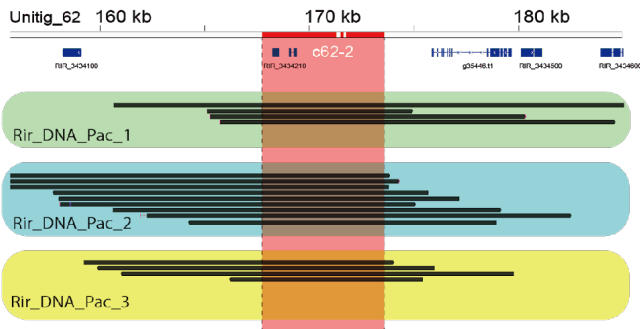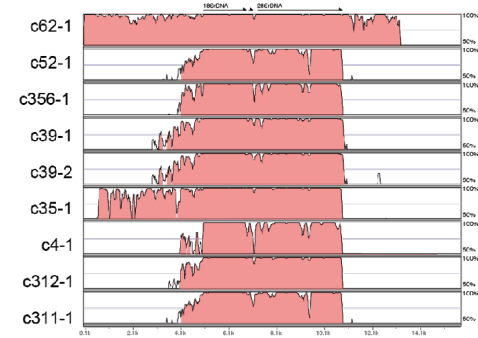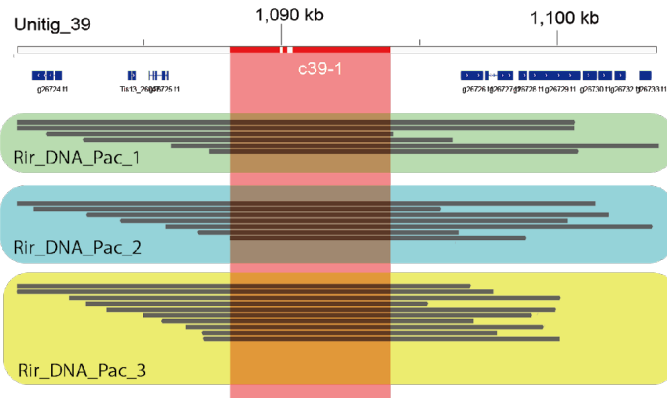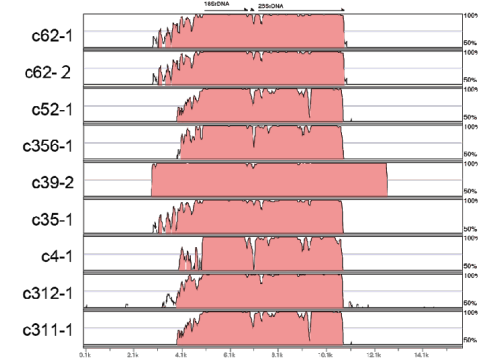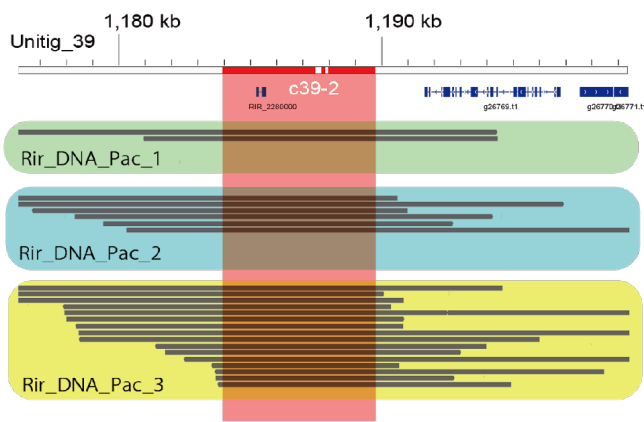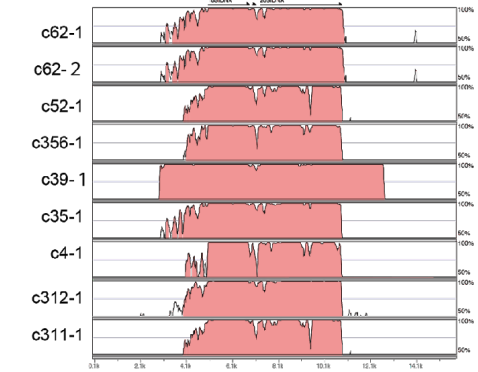

673  
674  
675

(Continued)

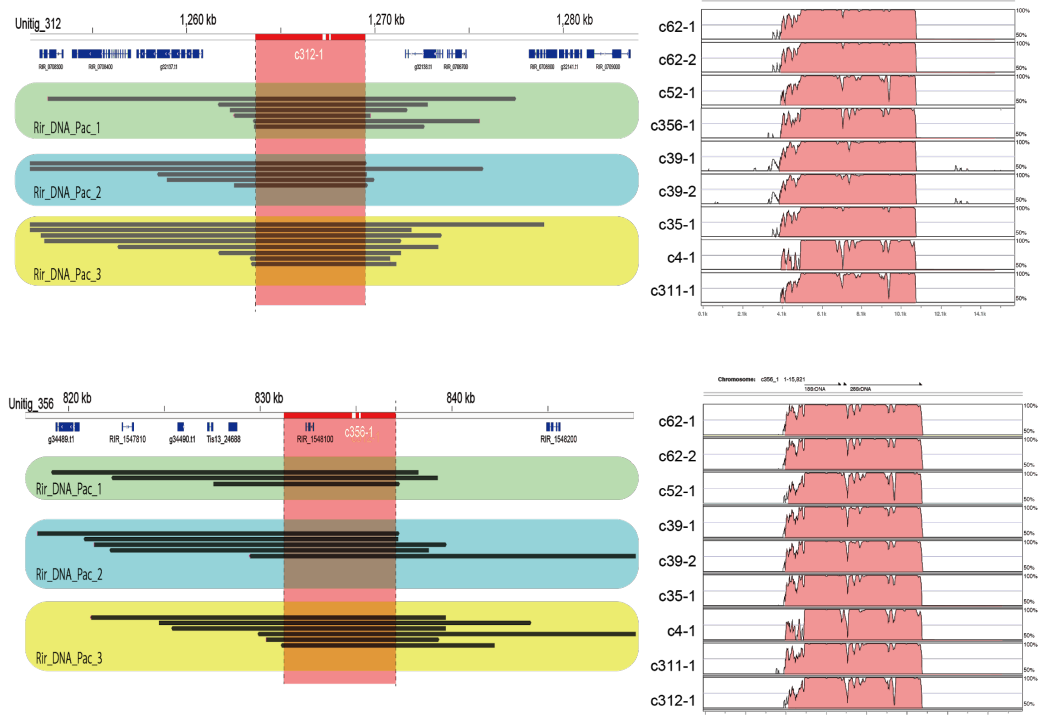

676  
677  
678

**Supplementary Fig. 4 Mapped PacBio reads of rDNA regions of RIR17 contigs and the sequence similarity of rDNAs with other rDNA regions in RIR17**

679 The colors have the same meanings as in Fig. 3a-b.

680

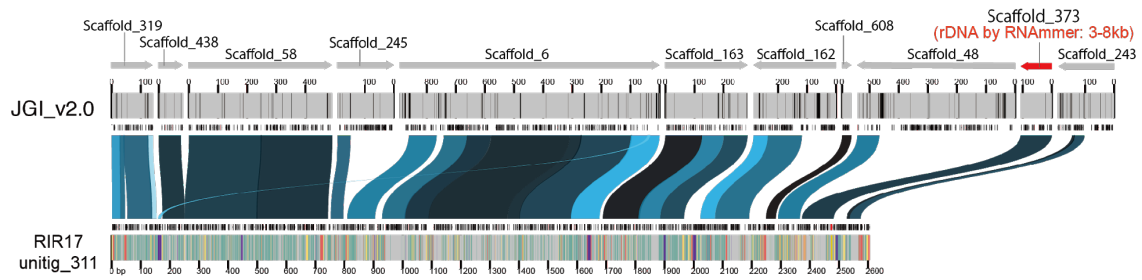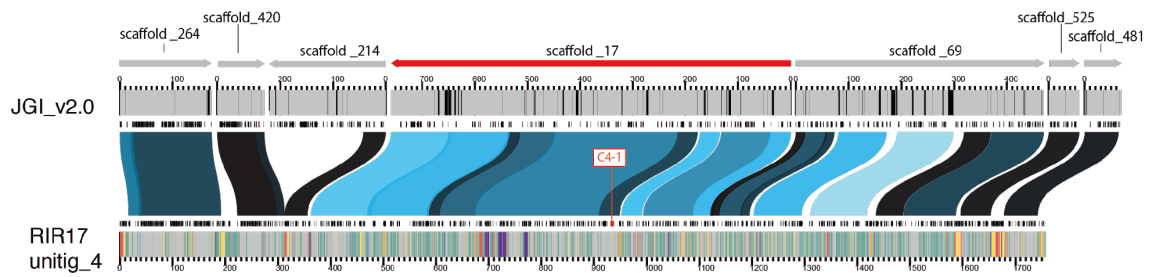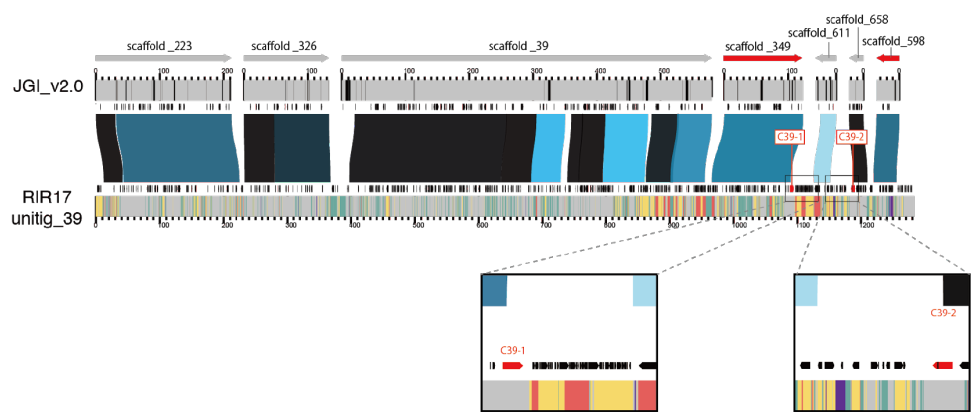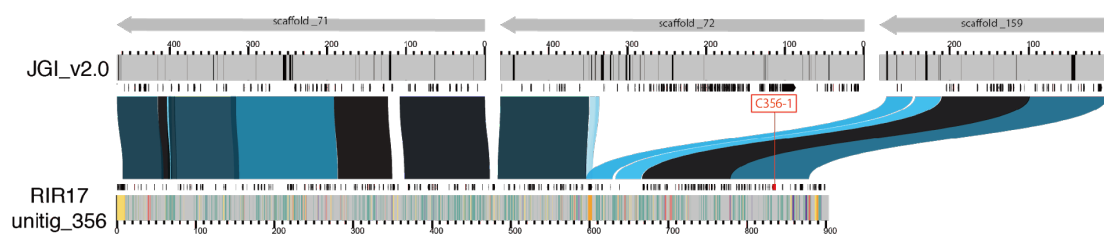

681  
682  
683  
684

(Continued)



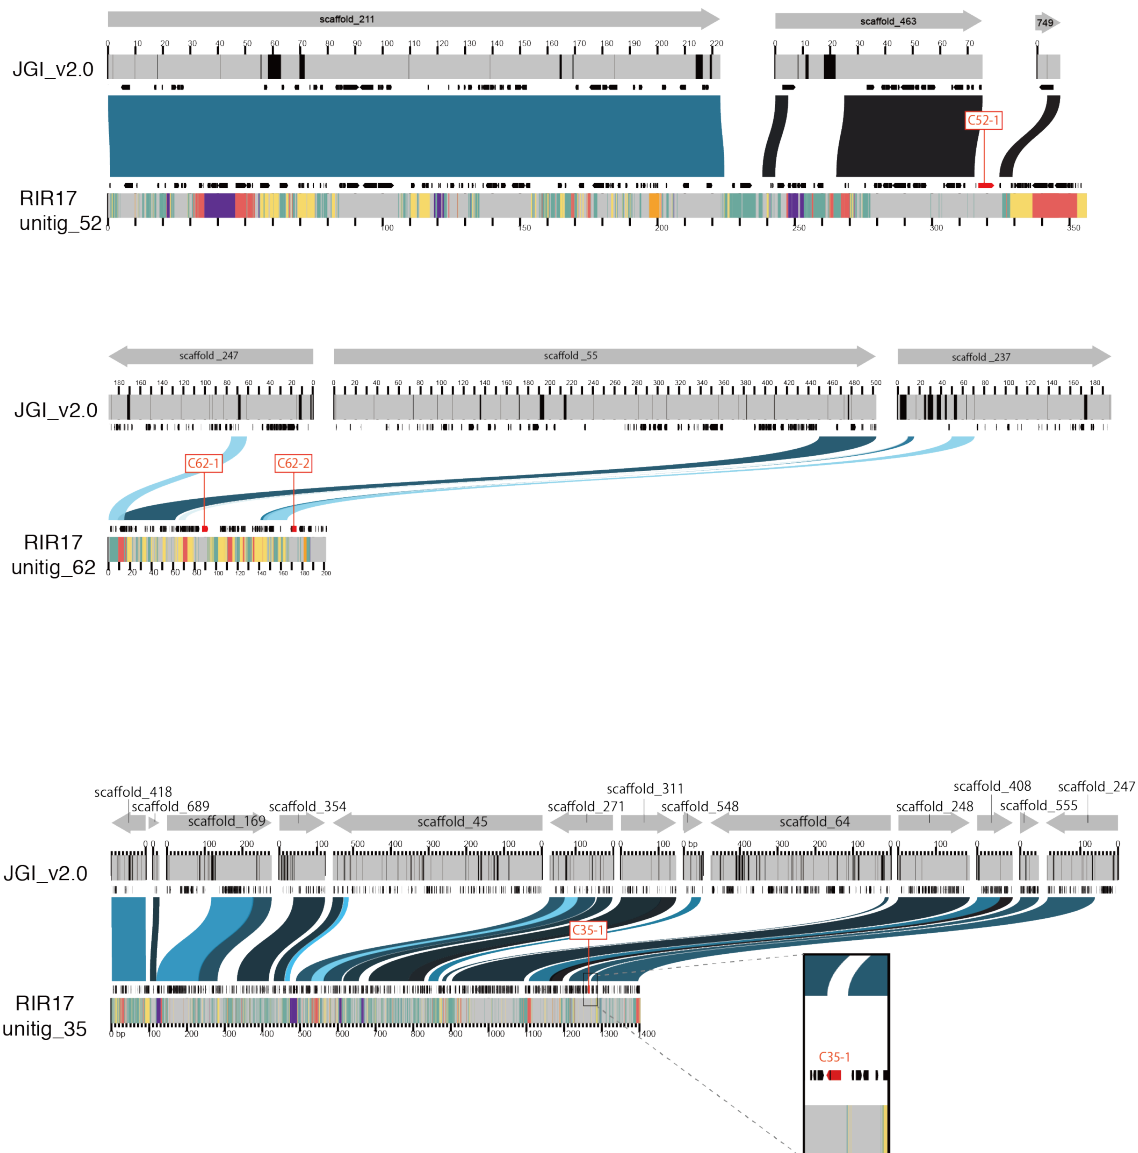

685  
686  
687

**Figure S5 Positions and identities of JGI\_v2.0 scaffold aligned against RIR17 contigs with rDNAs.**

688

The colors have the same meanings as in Figure 3c.

689

690

691

692

693

## 694 **References**

- 695 1. Remy, W., Taylor, T. N., Hass, H. & Kerp, H. Four hundred-million-year-old vesicular arbuscular mycorrhizae.  
696 *Proceedings of the National Academy of Sciences* **91**, 11841–11843 (1994).
- 697 2. Redecker, D., Kodner, R. & Graham, L. E. Glomalean fungi from the Ordovician. *Science* **289**, 1920–1921  
698 (2000).
- 699 3. Smith, S. E., Jakobsen, I., Grønlund, M. & Andrew Smith, F. Roles of Arbuscular Mycorrhizas in Plant  
700 Phosphorus Nutrition: Interactions between Pathways of Phosphorus Uptake in Arbuscular Mycorrhizal Roots  
701 Have Important Implications for Understanding and Manipulating Plant Phosphorus Acquisition. *Plant Physiol.*  
702 **156**, 1050–1057 (2011).
- 703 4. Bougoure, J., Ludwig, M., Brundrett, M. & Grierson, P. Identity and specificity of the fungi forming  
704 mycorrhizas with the rare mycoheterotrophic orchid *Rhizanthella gardneri*. *Mycol. Res.* **113**, 1097–1106 (2009).
- 705 5. Parniske, M. Arbuscular mycorrhiza: the mother of plant root endosymbioses. *Nat. Rev. Microbiol.* **6**, 763–775  
706 (2008).
- 707 6. van der Heijden, M. G. A. *et al.* Mycorrhizal fungal diversity determines plant biodiversity, ecosystem  
708 variability and productivity. *Nature* **396**, 69–72 (1998).
- 709 7. Johnson, N. C., Graham, J. H. & Smith, F. A. Functioning of mycorrhizal associations along the mutualism-  
710 parasitism continuum. *New Phytol.* **135**, 575–586 (1997).
- 711 8. Davison, J. *et al.* Global assessment of arbuscular mycorrhizal fungus diversity reveals very low endemism.  
712 *Science* **349**, 970–973 (2015).
- 713 9. Fellbaum, C. R. *et al.* Fungal nutrient allocation in common mycorrhizal networks is regulated by the carbon  
714 source strength of individual host plants. *New Phytol.* **203**, 646–656 (2014).
- 715 10. Lee, J. The Distribution of Cytoplasm and Nuclei within the Extra-radical Mycelia in *Glomus intraradices*, a  
716 Species of Arbuscular Mycorrhizal Fungi. *Mycobiology* **39**, 79–84 (2011).
- 717 11. Zhang, Y. & Guo, L. D. Arbuscular mycorrhizal structure and fungi associated with mosses. *Mycorrhiza* **17**,  
718 319–325 (2007).
- 719 12. Tang, N. *et al.* A Survey of the Gene Repertoire of *Gigaspora rosea* Unravels Conserved Features among  
720 Glomeromycota for Obligate Biotrophy. *Front. Microbiol.* **7**, 233 (2016).
- 721 13. Lin, K. *et al.* Single Nucleus Genome Sequencing Reveals High Similarity among Nuclei of an  
722 Endomycorrhizal Fungus. *PLoS Genet.* **10**, (2014).
- 723 14. Chen, E. C. H. *et al.* High intraspecific genome diversity in the model arbuscular mycorrhizal symbiont  
724 *Rhizophagus irregularis*. *New Phytol.* (2018). doi:10.1111/nph.14989
- 725 15. Toro, K. S. & Brachmann, A. The effector candidate repertoire of the arbuscular mycorrhizal fungus  
726 *Rhizophagus clarus*. *BMC Genomics* **17**, (2016).

- 727 16. Ropars, J. *et al.* Evidence for the sexual origin of heterokaryosis in arbuscular mycorrhizal fungi. *Nat Microbiol*  
728 **1**, 16033 (2016).
- 729 17. Tisserant, E. *et al.* Genome of an arbuscular mycorrhizal fungus provides insight into the oldest plant symbiosis.  
730 *Proc. Natl. Acad. Sci. U. S. A.* **110**, 20117–20122 (2013).
- 731 18. Mohanta, T. K. & Bae, H. The diversity of fungal genome. *Biol. Proced. Online* **17**, (2015).
- 732 19. Ma, L. J. *et al.* Genomic Analysis of the Basal Lineage Fungus *Rhizopus oryzae* Reveals a Whole-Genome  
733 Duplication. *PLoS Genet.* **5**, (2009).
- 734 20. Eickbush, T. H. & Eickbush, D. G. Finely orchestrated movements: Evolution of the ribosomal RNA genes.  
735 *Genetics* **175**, 477–485 (2007).
- 736 21. Sanders, I. R., Alt, M., Groppe, K., Boller, T. & Wiemken, A. Identification of Ribosomal DNA Polymorphisms  
737 among and within Spores of the Glomales - Application to Studies on the Genetic Diversity of Arbuscular  
738 Mycorrhizal Fungal Communities. *New Phytol.* **130**, 419–427 (1995).
- 739 22. LloydMacgilp, S. A. *et al.* Diversity of the ribosomal internal transcribed spacers within and among isolates of  
740 *Glomus mosseae* and related mycorrhizal fungi. *New Phytol.* **133**, 103–111 (1996).
- 741 23. Hosny, M., Hijri, M., Passerieux, E. & Dulieu, H. rDNA units are highly polymorphic in *Scutellospora castanea*  
742 (*Glomales*, *Zygomycetes*). *Gene* **226**, 61–71 (1999).
- 743 24. Hijri, M. & Sanders, I. R. The arbuscular mycorrhizal fungus *Glomus intraradices* is haploid and has a small  
744 genome size in the lower limit of eukaryotes. *Fungal Genet. Biol.* **41**, 253–261 (2004).
- 745 25. Pawlowska, T. E. & Taylor, J. W. Organization of genetic variation in individuals of arbuscular mycorrhizal  
746 fungi. *Nature* **427**, 733–737 (2004).
- 747 26. Rosendahl, S. & Stukenbrock, E. H. Community structure of arbuscular mycorrhizal fungi in undisturbed  
748 vegetation revealed by analyses of LSU rDNA sequences. *Mol. Ecol.* **13**, 3179–3186 (2004).
- 749 27. Schussler, A., Schwarzott, D. & Walker, C. A new fungal phylum, the Glomeromycota: phylogeny and  
750 evolution. *Mycol. Res.* **105**, 1413–1421 (2001).
- 751 28. Krüger, M., Krüger, C., Walker, C., Stockinger, H. & Schüssler, A. Phylogenetic reference data for systematics  
752 and phylotaxonomy of arbuscular mycorrhizal fungi from phylum to species level. *New Phytol.* **193**, 970–984  
753 (2012).
- 754 29. VanKuren, N. W., den Bakker, H. C., Morton, J. B. & Pawlowska, T. E. Ribosomal Rna Gene Diversity,  
755 Effective Population Size, and Evolutionary Longevity in Asexual Glomeromycota. *Evolution* **67**, 207–224  
756 (2013).
- 757 30. Ganley, A. R. D. & Kobayashi, T. Highly efficient concerted evolution in the ribosomal DNA repeats: Total  
758 rDNA repeat variation revealed by whole-genome shotgun sequence data. *Genome Res.* **17**, 184–191 (2007).
- 759 31. Milo, R. *et al.* Cell Biology by the Numbers : Ron Milo : 9780815345374. *Taylor & Francis Inc* Available at:

- 760 <https://www.bookdepository.com/Cell-Biology-by-Numbers-Ron-Milo/9780815345374>. (Accessed: 5th March  
761 2018)
- 762 32. Ganley, A. R. D., Ide, S., Saka, K. & Kobayashi, T. The effect of replication initiation on gene amplification in  
763 the rDNA and its relationship to aging. *Mol. Cell* **35**, 683–693 (2009).
- 764 33. Kobayashi, T. Ribosomal RNA gene repeats, their stability and cellular senescence. *Proceedings of the Japan*  
765 *Academy Series B-Physical and Biological Sciences* **90**, 119–129 (2014).
- 766 34. Bhargava, R., Onyango, D. O. & Stark, J. M. Regulation of Single-Strand Annealing and its Role in Genome  
767 Maintenance. *Trends Genet.* **32**, 566–575 (2016).
- 768 35. Chin, C. S. *et al.* Nonhybrid, finished microbial genome assemblies from long-read SMRT sequencing data. *Nat.*  
769 *Methods* **10**, 563–569 (2013).
- 770 36. Parra, G., Bradnam, K. & Korf, I. CEGMA: a pipeline to accurately annotate core genes in eukaryotic genomes.  
771 *Bioinformatics* **23**, 1061–1067 (2007).
- 772 37. A F A Smit, R. H. RepeatMasker. Available at: <http://repeatmasker.org>.
- 773 38. Kajikawa, M. & Okada, N. LINEs mobilize SINEs in the eel through a shared 3' sequence. *Cell* **111**, 433–444  
774 (2002).
- 775 39. Simao, F. A., Waterhouse, R. M., Ioannidis, P., Kriventseva, E. V. & Zdobnov, E. M. BUSCO: assessing  
776 genome assembly and annotation completeness with single-copy orthologs. *Bioinformatics* **31**, 3210–3212  
777 (2015).
- 778 40. Radha, V., Nambirajan, S. & Swarup, G. Association of Lyn tyrosine kinase with the nuclear matrix and cell-  
779 cycle-dependent changes in matrix-associated tyrosine kinase activity. *Eur. J. Biochem.* **236**, 352–359 (1996).
- 780 41. Tsuzuki, S., Handa, Y., Takeda, N. & Kawaguchi, M. Strigolactone-Induced Putative Secreted Protein 1 Is  
781 Required for the Establishment of Symbiosis by the Arbuscular Mycorrhizal Fungus *Rhizophagus irregularis*.  
782 *Mol. Plant. Microbe. Interact.* **29**, 277–286 (2016).
- 783 42. Tehlivets, O., Scheuringer, K. & Kohlwein, S. D. Fatty acid synthesis and elongation in yeast. *Biochimica Et*  
784 *Biophysica Acta-Molecular and Cell Biology of Lipids* **1771**, 255–270 (2007).
- 785 43. Li, M. G. *et al.* Thiamine Biosynthesis in *Saccharomyces cerevisiae* Is Regulated by the NAD(+)- Dependent  
786 Histone Deacetylase Hst1. *Mol. Cell. Biol.* **30**, 3329–3341 (2010).
- 787 44. Wewer, V., Brands, M. & Dormann, P. Fatty acid synthesis and lipid metabolism in the obligate biotrophic  
788 fungus *Rhizophagus irregularis* during mycorrhization of *Lotus japonicus*. *Plant J.* **79**, 398–412 (2014).
- 789 45. Keymer, A. *et al.* Lipid transfer from plants to arbuscular mycorrhiza fungi. *Elife* **6**, (2017).
- 790 46. Bravo, A., Brands, M., Wewer, V., Dormann, P. & Harrison, M. J. Arbuscular mycorrhiza-specific enzymes  
791 FatM and RAM2 fine-tune lipid biosynthesis to promote development of arbuscular mycorrhiza. *New Phytol.*  
792 **214**, 1631–1645 (2017).

- 793 47. Prokopowich, C. D., Gregory, T. R. & Crease, T. J. The correlation between rDNA copy number and genome  
794 size in eukaryotes. *Genome* **46**, 48–50 (2003).
- 795 48. Cushion, M. T. & Keely, S. P. Assembly and Annotation of *Pneumocystis jirovecii* from the Human Lung  
796 Microbiome. *MBio* **4**, (2013).
- 797 49. Gardner, M. J. *et al.* Genome sequence of the human malaria parasite *Plasmodium falciparum*. *Nature* **419**, 498–  
798 511 (2002).
- 799 50. Timmis, J. N., Ayliffe, M. A., Huang, C. Y. & Martin, W. Endosymbiotic gene transfer: organelle genomes  
800 forge eukaryotic chromosomes. *Nat. Rev. Genet.* **5**, 123–135 (2004).
- 801 51. Li, H. Aligning sequence reads, clone sequences and assembly contigs with BWA-MEM. *arXiv [q-bio.GN]*  
802 (2013).
- 803 52. Gibbons, J. G., Branco, A. T., Godinho, S. A., Yu, S. K. & Lemos, B. Concerted copy number variation  
804 balances ribosomal DNA dosage in human and mouse genomes. *Proc. Natl. Acad. Sci. U. S. A.* **112**, 2485–2490  
805 (2015).
- 806 53. Kaul, S. *et al.* Analysis of the genome sequence of the flowering plant *Arabidopsis thaliana*. *Nature* **408**, 796–  
807 815 (2000).
- 808 54. Mentewab, A. B., Jacobsen, M. J. & Flowers, R. A. Incomplete homogenization of 18 S ribosomal DNA coding  
809 regions in *Arabidopsis thaliana*. *BMC Res. Notes* **4**, 93 (2011).
- 810 55. Vembar, S. S., Droll, D. & Scherf, A. Translational regulation in blood stages of the malaria parasite  
811 *Plasmodium* spp.: systems-wide studies pave the way. *Wiley Interdisciplinary Reviews-Rna* **7**, 772–792 (2016).
- 812 56. Andersen, S. L. & Sekelsky, J. Meiotic versus mitotic recombination: two different routes for double-strand  
813 break repair: the different functions of meiotic versus mitotic DSB repair are reflected in different pathway  
814 usage and different outcomes. *Bioessays* **32**, 1058–1066 (2010).
- 815 57. Cappé, O. & Moulines, E. On-line expectation-maximization algorithm for latent data models. *J. R. Stat. Soc.*  
816 *Series B Stat. Methodol.* **71**, 593–613 (2009).
- 817 58. Birch, J. L. & Zomerdijk, J. C. B. M. Structure and function of ribosomal RNA gene chromatin. *Biochem. Soc.*  
818 *Trans.* **36**, 619–624 (2008).
- 819 59. Brennicke, A., Marchfelder, A. & Binder, S. RNA editing. *FEMS Microbiol. Rev.* **23**, 297–316 (1999).
- 820 60. Xue, S. F. & Barna, M. Specialized ribosomes: a new frontier in gene regulation and organismal biology. *Nat.*  
821 *Rev. Mol. Cell Biol.* **13**, 355–369 (2012).
- 822 61. Sanders, I. R. & Croll, D. Arbuscular Mycorrhiza: The Challenge to Understand the Genetics of the Fungal  
823 Partner. *Annual Review of Genetics, Vol 44* **44**, 271–292 (2010).
- 824 62. Corradi, N. & Brachmann, A. Fungal Mating in the Most Widespread Plant Symbionts? *Trends Plant Sci.* **22**,  
825 175–183 (2017).

- 826 63. Fulton, T. M., Chunwongse, J. & Tanksley, S. D. Microprep Protocol for Extraction of DNA from Tomato and  
827 Other Herbaceous Plants. *Plant Mol. Biol. Rep.* **13**, 207–209 (1995).
- 828 64. Gurevich, A., Saveliev, V., Vyahhi, N. & Tesler, G. QUAST: quality assessment tool for genome assemblies.  
829 *Bioinformatics* **29**, 1072–1075 (2013).
- 830 65. Marçais, G. *et al.* MUMmer4: A fast and versatile genome alignment system. *PLoS Comput. Biol.* **14**, e1005944  
831 (2018).
- 832 66. Trapnell, C., Pachter, L. & Salzberg, S. L. TopHat: discovering splice junctions with RNA-Seq. *Bioinformatics*  
833 **25**, 1105–1111 (2009).
- 834 67. Keller, O., Kollmar, M., Stanke, M. & Waack, S. A novel hybrid gene prediction method employing protein  
835 multiple sequence alignments. *Bioinformatics* **27**, 757–763 (2011).
- 836 68. Slater, G. S. & Birney, E. Automated generation of heuristics for biological sequence comparison. *BMC*  
837 *Bioinformatics* **6**, (2005).
- 838 69. Liao, Y., Smyth, G. K. & Shi, W. featureCounts: an efficient general purpose program for assigning sequence  
839 reads to genomic features. *Bioinformatics* **30**, 923–930 (2014).
- 840 70. Jones, P. *et al.* InterProScan 5: genome-scale protein function classification. *Bioinformatics* **30**, 1236–1240  
841 (2014).
- 842 71. Emms, D. M. & Kelly, S. OrthoFinder: solving fundamental biases in whole genome comparisons dramatically  
843 improves orthogroup inference accuracy. *Genome Biol.* **16**, 157 (2015).
- 844 72. De Bie, T., Cristianini, N., Demuth, J. P. & Hahn, M. W. CAFE: a computational tool for the study of gene  
845 family evolution. *Bioinformatics* **22**, 1269–1271 (2006).
- 846 73. Nguyen, L.-T., Schmidt, H. A., von Haeseler, A. & Minh, B. Q. IQ-TREE: a fast and effective stochastic  
847 algorithm for estimating maximum-likelihood phylogenies. *Mol. Biol. Evol.* **32**, 268–274 (2015).
- 848 74. Smith, A. B. Cambrian problematica and the diversification of deuterostomes. *BMC Biol.* **10**, 79 (2012).
- 849 75. Quinlan, A. R. BEDTools: The Swiss-Army Tool for Genome Feature Analysis. *Curr. Protoc. Bioinformatics*  
850 **47**, 11.12.1–34 (2014).
- 851 76. Yin, Y. *et al.* dbCAN: a web resource for automated carbohydrate-active enzyme annotation. *Nucleic Acids Res.*  
852 **40**, W445–51 (2012).
- 853 77. Lagesen, K. *et al.* RNAMmer: consistent and rapid annotation of ribosomal RNA genes. *Nucleic Acids Res.* **35**,  
854 3100–3108 (2007).
- 855 78. Katoh, K., Misawa, K., Kuma, K. & Miyata, T. MAFFT: a novel method for rapid multiple sequence alignment  
856 based on fast Fourier transform. *Nucleic Acids Res.* **30**, 3059–3066 (2002).
- 857 79. Langmead, B. & Salzberg, S. L. Fast gapped-read alignment with Bowtie 2. *Nat. Methods* **9**, 357–359 (2012).
- 858 80. Ankenbrand, M. J., Hohlfield, S., Hackl, T. & Förster, F. AliTV—interactive visualization of whole genome

- 859 comparisons. *PeerJ Comput. Sci.* **3**, e116 (2017).
- 860 81. Kumar, S., Stecher, G. & Tamura, K. MEGA7: Molecular Evolutionary Genetics Analysis Version 7.0 for  
861 Bigger Datasets. *Mol. Biol. Evol.* **33**, 1870–1874 (2016).
- 862 82. Schattner, P., Brooks, A. N. & Lowe, T. M. The tRNAscan-SE, snoscan and snoGPS web servers for the  
863 detection of tRNAs and snoRNAs. *Nucleic Acids Res.* **33**, W686–W689 (2005).
- 864 83. Kwan, E. X., Wang, X. B. S., Amemiya, H. M., Brewer, B. J. & Raghuraman, M. K. rDNA Copy Number  
865 Variants Are Frequent Passenger Mutations in *Saccharomyces cerevisiae* Deletion Collections and de Novo  
866 Transformants. *G3-Genes Genomes Genetics* **6**, 2829–2838 (2016).
- 867 84. Goffeau, A. *et al.* Life with 6000 genes. *Science* **274**, 546–& (1996).
- 868 85. Frazer, K. A., Pachter, L., Poliakov, A., Rubin, E. M. & Dubchak, I. VISTA: computational tools for  
869 comparative genomics. *Nucleic Acids Res.* **32**, W273–9 (2004).
- 870 86. Simon, U. K. & Weiss, M. Intragenomic Variation of Fungal Ribosomal Genes Is Higher than Previously  
871 Thought. *Mol. Biol. Evol.* **25**, 2251–2254 (2008).
- 872
