# Supplementary material for: Evidence of non-tandemly repeated rDNAs and their intragenomic heterogeneity in Rhizophagus irregularis
Source: bioRxiv or medRxiv preprint supplement (doi:10.1101/205864), 2018-03-26
Supplement: Supplementary file [file 205864-1.pdf]

**Table S1 Summary of the sequencing data**

| Sequence ID   | DRA ID    | Library construction and sequencing method | DNA/RNA | Read #      | Read length | Total base-pairs (Mbp) |
|---------------|-----------|--------------------------------------------|---------|-------------|-------------|------------------------|
| Rir_DNA_Pac_1 | DRA004849 | PacBio RSII, P6-C4 sequence chemistry      | DNA     | 348,539     | *7559       | 2,635                  |
| Rir_DNA_Pac_2 | DRA004878 | PacBio RSII, P6-C4 sequence chemistry      | DNA     | 394,261     | *8562       | 3,376                  |
| Rir_DNA_Pac_3 | DRA004889 | PacBio RSII, P6-C4 sequence chemistry      | DNA     | 761,112     | *7500       | 5,708                  |
| Rir_DNA_PE180 | DRA004835 | Hiseq PE126,TruSeq DNA prep kit            | DNA     | 423,041,682 | 126         | 53,303                 |
| Rir_RNA_SS    | DRA005204 | Hiseq PE101,TruSeq RNA prep kit            | RNA     | 16,122,964  | 101         | 1,628                  |
| Rir_RNA_rRNA  | -         | Miseq PE301,TruSeq RNA prep kit            | RNA     | 20,904,594  | 301         | 6,292                  |

\*Average read length

**Tables S2 Blast hit data of eliminated contamination sequences**

Query; Illumina-polished assembly, Database; Refseq\_genome, blast; default blastn search

| Assembly ID | Hit ID       | Assembly length | Identity % | Query cover % | Max bit score | Total score | E-value | subject title                                                                                                               |
|-------------|--------------|-----------------|------------|---------------|---------------|-------------|---------|-----------------------------------------------------------------------------------------------------------------------------|
| unitig_103  | NW_016089427 | 4223            | 99         | 100           | 7548          | 25444       | 0       | Daucus carota subsp. sativus cultivar DH1 unplaced genomic scaffold, ASM162521v1 DCARv2_B11, whole genome shotgun sequence  |
| unitig_228  | NC_030383    | 2192            | 93         | 100           | 3208          | 87603       | 0       | Daucus carota subsp. sativus cultivar DH1 chromosome 3, ASM162521v1, whole genome shotgun sequence                          |
| unitig_85   | NW_016092113 | 14490           | 99         | 99            | 10975         | 106600      | 0       | Daucus carota subsp. sativus cultivar DH1 unplaced genomic scaffold, ASM162521v1 DCARv2_S316, whole genome shotgun sequence |
| unitig_109  | NW_016089417 | 1602            | 99         | 100           | 2826          | 52864       | 0       | Daucus carota subsp. sativus cultivar DH1 chromosome 2 genomic scaffold, ASM162521v1 2, whole genome shotgun sequence       |
| unitig_88   | NW_016092113 | 14867           | 98         | 100           | 11607         | 90386       | 0       | Daucus carota subsp. sativus cultivar DH1 unplaced genomic scaffold, ASM162521v1 DCARv2_S316, whole genome shotgun sequence |
| unitig_100  | NW_016089417 | 8259            | 94         | 100           | 12676         | 539700      | 0       | Daucus carota subsp. sativus cultivar DH1 chromosome 2 genomic scaffold, ASM162521v1 2, whole genome shotgun sequence       |
| unitig_83   | NW_016092113 | 46670           | 98         | 100           | 11686         | 328700      | 0       | Daucus carota subsp. sativus cultivar DH1 unplaced genomic scaffold, ASM162521v1 DCARv2_S316, whole genome shotgun sequence |
| unitig_84   | NW_016092113 | 14454           | 98         | 100           | 11673         | 103600      | 0       | Daucus carota subsp. sativus cultivar DH1 unplaced genomic scaffold, ASM162521v1 DCARv2_S316, whole genome shotgun sequence |
| unitig_101  | NC_030388    | 3879            | 95         | 100           | 6058          | 146300      | 0       | Daucus carota subsp. sativus cultivar DH1 chromosome 8, ASM162521v1, whole genome shotgun sequence                          |

**Table S3 Assembly statistics of *R. irregularis* genomes**

| Assembly ID | IDs in public database (database)    | # assembles | Total length | % total length | # N's bases | N50 (bp)  | Longest assembly | CEGMA completeness |      |
|-------------|--------------------------------------|-------------|--------------|----------------|-------------|-----------|------------------|--------------------|------|
|             |                                      |             |              |                |             |           |                  | #                  | %    |
| RIR17       | BDIQ01000000 (DDBJ)                  | 210         | 149,750,837  | 97.24          | 0           | 2,308,146 | 5,727,599        | 244                | 98.4 |
| Lin_14      | JEMT00000000 (Genbank)               | 30,233      | 140,695,967  | 91.36          | 30,115      | 16,434    | 198,953          | 229                | 92.3 |
| Tis_13      | <i>R. irregularis</i> v1.0 (MycCosm) | 28,371      | 91,083,792   | 59.15          | 270,422     | 4,186     | 57,883           | -                  | 98   |

**Table S4 Predicted gene number and BUSCO completeness of *R. irregularis* DAOM-181602 genomes**

|        | Gene model (Longest isoform) |                     | Isoform model |                     | Complete BUSCOs (S+D) |      | Complete and single-copy BUSCOs (S) |      | Complete and duplicated BUSCOs (D) |      | Fragmented BUSCOs |      | Missing BUSCOs |     |
|--------|------------------------------|---------------------|---------------|---------------------|-----------------------|------|-------------------------------------|------|------------------------------------|------|-------------------|------|----------------|-----|
|        | #                            | Average length (AA) | #             | Average length (AA) | #                     | %    | #                                   | %    | #                                  | %    | #                 | %    | #              | %   |
| RIR17  | 41,572                       | 377                 | 43,675        | 378                 | 273                   | 94.1 | 243                                 | 83.8 | 30                                 | 10.3 | 11                | 3.8  | 6              | 2.1 |
| Lin_14 | 27,301                       | 347                 | 29,911        | 351                 | 256                   | 88.3 | 186                                 | 64.1 | 70                                 | 24.1 | 7                 | 2.4  | 27             | 9.3 |
| Tis_13 | 30,282                       | 270                 | -             | -                   | 257                   | 88.6 | 251                                 | 86.6 | 6                                  | 2.1  | 29                | 10.0 | 4              | 1.4 |

**Table S5 Gene model confidence based on RNA-seq expression support, homology evidence or protein motif evidence**  
(See "Table\_S05.xlsx")

**Table S6 Gene number joined for each orthologous group in orthoDB9**  
(See "Table\_S06.xlsx")

**Table S7 Blast search of genes involved in the degradation of plant cell wall**

Query; Corresponding gene in *Aspergillus niger*, Database; all of constructed gene models from RIR17 (for blastp search), or RIR17 genomic sequences (for tblastn search)

| Activity category                       | CAZy ID  | Corresponding gene in <i>Aspergillus niger</i> CBS 513.88 | Blastp (e-value < 1E-4) | tBlastn (e-value < 1E-4) |
|-----------------------------------------|----------|-----------------------------------------------------------|-------------------------|--------------------------|
| Polysaccharide lyases                   | PL4      | CAK48272                                                  | No-hit                  | No-hit                   |
|                                         |          | CAK46452                                                  | No-hit                  | No-hit                   |
|                                         | PL1      | CAK48551                                                  | No-hit                  | No-hit                   |
|                                         |          | CAK48529                                                  | No-hit                  | No-hit                   |
|                                         |          | CAK48388                                                  | No-hit                  | No-hit                   |
|                                         |          | CAK47350                                                  | No-hit                  | No-hit                   |
|                                         |          | CAK40523                                                  | No-hit                  | No-hit                   |
|                                         | CAK37997 | No-hit                                                    | No-hit                  |                          |
| Cellobiohydrolases                      | GH7      | AAF04492                                                  | No-hit                  | No-hit                   |
|                                         |          | AAF04491                                                  | No-hit                  | No-hit                   |
|                                         | GH6      | CAK41068                                                  | No-hit                  | No-hit                   |
|                                         |          | CAK39856                                                  | No-hit                  | No-hit                   |
| Lytic polysaccharide mono-oxygenases    | AA9      | CAK97324                                                  | No-hit                  | No-hit                   |
|                                         |          | CAK97151                                                  | No-hit                  | No-hit                   |
|                                         |          | CAK46515                                                  | No-hit                  | No-hit                   |
|                                         |          | CAK45495                                                  | No-hit                  | No-hit                   |
|                                         |          | CAK42466                                                  | No-hit                  | No-hit                   |
|                                         |          | CAK41095                                                  | No-hit                  | No-hit                   |
|                                         |          | CAK38942                                                  | No-hit                  | No-hit                   |
| Proteins with cellulose-binding motif 1 | CBM1     | CAK97324                                                  | No-hit                  | No-hit                   |
|                                         |          | CAK46515                                                  | No-hit                  | No-hit                   |
|                                         |          | CAK44069                                                  | No-hit                  | No-hit                   |
|                                         |          | CAK43558                                                  | No-hit                  | No-hit                   |
|                                         |          | CAK42930                                                  | No-hit                  | No-hit                   |
|                                         |          | CAK42466                                                  | No-hit                  | No-hit                   |
|                                         |          | CAK41068                                                  | No-hit                  | No-hit                   |
|                                         |          | AAF04492                                                  | No-hit                  | No-hit                   |

**Table S8 Blast search of "the missing ascomycete core genes orthologs" by Tang et al. 2016**  
(See "Table\_S08.xlsx")

**Table S9 Blast hits of the index genes used for previous heterokaryosis studies.**  
(See "Table\_S09.xlsx")

**Table S10 Masked repetitive region of RIR17 and selected organisms**  
(See "Table\_S10.xlsx")

**Table S11 Number of detected isoforms having a transposase related domain**

| Pfam ID | Description                            | # isoform |
|---------|----------------------------------------|-----------|
| PF10683 | Hermes transposase DNA-binding domain  | 5         |
| PF03108 | MuDR family transposase                | 1         |
| PF10551 | MULE transposase domain                | 208       |
| PF12784 | PD-(D/E)XK nuclease family transposase | 1         |
| PF03221 | Tc5 transposase DNA-binding domain     | 160       |
| PF01498 | Transposase                            | 132       |
| PF02992 | Transposase family tnp2                | 294       |
| PF13843 | Transposase IS4                        | 6         |
| PF12017 | Transposase protein                    | 1         |
| PF00872 | Transposase, Mutator family            | 2         |
|         | Total                                  | 810       |



**Table S12 Position and size of ribosomal DNAs in RIR17 assemblies**

(See "Table\_S12.xlsx")

**Figure S13 Mapped read depth of coverage to RIR17 genes.**

\*Calculated by mapping of DNA short reads (Rir\_DNA\_PE180) into selected ten BUSCO genes and consensus rDNA sequences from ten rDNA paralogs.

|        | isoform ID           | Mean read depth of coverage* |
|--------|----------------------|------------------------------|
|        | g15690.t1            | 159.3                        |
|        | g16450.t1            | 160.3                        |
|        | g24696.t1            | 157.4                        |
|        | g13527.t1            | 149.0                        |
| BUSCOs | g1455.t1             | 162.1                        |
|        | g11464.t1            | 153.4                        |
|        | g13372.t1            | 152.5                        |
|        | g31539.t1            | 155.3                        |
|        | g6363.t1             | 146.1                        |
|        | g11459.t1            | 144.2                        |
| rDNAs  | rDNA_Consensus_IUPAC | 1733.3                       |

**Table S14 Different positions among rDNA paralogs in RIR17**  
(See "Table\_S14.xlsx")

**Table S15 Mean Intragenomic differences among ten rDNA paralogs**

SD = standard deviation

| Region                | Aligned positions | # difference |       | # indel |       | Percent identity (%) |      |
|-----------------------|-------------------|--------------|-------|---------|-------|----------------------|------|
|                       |                   | Average      | SD    | Average | SD    | Average              | SD   |
| 18SrDNA               | 1811              | 1.58         | 1.09  | 0.47    | 0.50  | 99.91                | 0.06 |
| ITS1                  | 110               | 7.13         | 7.85  | 2.76    | 2.54  | 93.45                | 7.20 |
| 5.8SrDNA              | 158               | 5.29         | 5.14  | 3.00    | 3.14  | 96.65                | 3.25 |
| ITS2                  | 220               | 20.51        | 14.76 | 8.80    | 7.72  | 90.28                | 6.84 |
| 28SrDNA               | 3548              | 73.47        | 48.49 | 12.29   | 12.68 | 97.93                | 1.37 |
| Whole 48SrDNA cluster | 5847              | 106.13       | 69.60 | 27.31   | 22.84 | 98.18                | 1.19 |

**Table S16 Detected number of tRNA by tRNAscan-SE**

|                                 | tRNAs decoding<br>Standard 20 AA | Selenocysteine<br>tRNAs (TCA) | Possible suppressor<br>tRNAs (CTA,TTA) | tRNAs with<br>undetermined/unknown<br>isotypes | Predicted pseudogenes | tRNAs with introns |
|---------------------------------|----------------------------------|-------------------------------|----------------------------------------|------------------------------------------------|-----------------------|--------------------|
| RIR17                           | 110                              | 0                             | 1                                      | 17                                             | 12                    | 37                 |
| <i>Rhizopus oryzae</i>          | 237                              | 0                             | 0                                      | 0                                              | 2                     | 12                 |
| <i>Phycomyces blakesleeanus</i> | 308                              | 0                             | 1                                      | 0                                              | 0                     | 12                 |
| <i>Mortierella elongata</i>     | 253                              | 0                             | 0                                      | 2                                              | 3                     | 12                 |
| <i>Abisporus varbisporus</i>    | 157                              | 0                             | 0                                      | 0                                              | 3                     | 91                 |
| <i>Saccharomyces cerevisiae</i> | 286                              | 1                             | 0                                      | 2                                              | 6                     | 59                 |

**Table 17 Difference among the ten paralogs from RIR17 and cloning-based partial rDNAs from DAOM-181602**

| Cloning-based<br>sequence ID | Spore ID | # different sites from each rDNA paralogs in RIR17 |       |       |        |       |        |       |        |       |      |
|------------------------------|----------|----------------------------------------------------|-------|-------|--------|-------|--------|-------|--------|-------|------|
|                              |          | c39_2                                              | c62_2 | c39_1 | c312_1 | c35_1 | c311_1 | c52_1 | c356_1 | c62_1 | c4_1 |
| HF968915                     | 1        | 0                                                  | 21    | 0     | 26     | 25    | 39     | 39    | 24     | 21    | 26   |
| HF968920                     | 1        | 1                                                  | 22    | 1     | 25     | 24    | 38     | 38    | 25     | 22    | 25   |
| HF968987                     | 1        | 19                                                 | 2     | 19    | 7      | 6     | 22     | 22    | 36     | 2     | 42   |
| HF968919                     | 1        | 20                                                 | 1     | 20    | 6      | 5     | 23     | 23    | 37     | 1     | 41   |
| HF968922                     | 1        | 21                                                 | 0     | 21    | 5      | 4     | 24     | 24    | 36     | 0     | 42   |
| HF968986                     | 1        | 21                                                 | 2     | 21    | 7      | 6     | 26     | 26    | 36     | 2     | 42   |
| HF968917                     | 1        | 24                                                 | 36    | 24    | 41     | 40    | 53     | 53    | 0      | 36    | 6    |
| HF968921                     | 1        | 24                                                 | 36    | 24    | 41     | 40    | 53     | 53    | 0      | 36    | 6    |
| HF968984                     | 1        | 27                                                 | 43    | 27    | 46     | 45    | 56     | 56    | 7      | 43    | 1    |
| HF968916                     | 1        | 40                                                 | 21    | 40    | 22     | 21    | 3      | 3     | 52     | 21    | 54   |
| HF968985                     | 1        | 31                                                 | 18    | 31    | 21     | 20    | 8      | 8     | 47     | 18    | 47   |
| HF968918                     | 1        | 38                                                 | 19    | 38    | 18     | 17    | 7      | 7     | 52     | 19    | 54   |
| HF968989                     | 2        | 24                                                 | 36    | 24    | 41     | 40    | 53     | 53    | 0      | 36    | 6    |
| HF968992                     | 2        | 24                                                 | 36    | 24    | 41     | 40    | 53     | 53    | 0      | 36    | 6    |
| HF968927                     | 2        | 24                                                 | 36    | 24    | 41     | 40    | 53     | 53    | 0      | 36    | 6    |
| HF968923                     | 2        | 25                                                 | 4     | 25    | 1      | 0     | 24     | 24    | 40     | 4     | 44   |
| HF968990                     | 2        | 25                                                 | 4     | 25    | 1      | 0     | 24     | 24    | 40     | 4     | 44   |
| HF968991                     | 2        | 25                                                 | 41    | 25    | 44     | 43    | 54     | 54    | 5      | 41    | 1    |
| HF968988                     | 2        | 29                                                 | 8     | 29    | 3      | 4     | 28     | 28    | 44     | 8     | 48   |
| HF968924                     | 2        | 32                                                 | 46    | 32    | 51     | 50    | 45     | 45    | 10     | 46    | 12   |
| HF968925                     | 2        | 16                                                 | 9     | 16    | 10     | 9     | 29     | 29    | 36     | 9     | 36   |
| HF968926                     | 2        | 10                                                 | 21    | 10    | 26     | 25    | 43     | 43    | 15     | 21    | 21   |
| HF968914                     | 3        | 2                                                  | 19    | 2     | 24     | 23    | 39     | 39    | 22     | 19    | 24   |
| HF968910                     | 3        | 21                                                 | 0     | 21    | 5      | 4     | 24     | 24    | 36     | 0     | 42   |
| HF968912                     | 3        | 21                                                 | 0     | 21    | 5      | 4     | 24     | 24    | 36     | 0     | 42   |
| HF968913                     | 3        | 21                                                 | 0     | 21    | 5      | 4     | 24     | 24    | 36     | 0     | 42   |
| HF968982                     | 3        | 26                                                 | 42    | 26    | 45     | 44    | 55     | 55    | 6      | 42    | 0    |
| HF968911                     | 3        | 39                                                 | 24    | 39    | 25     | 24    | 0      | 0     | 53     | 24    | 55   |
| HF968983                     | 3        | 39                                                 | 24    | 39    | 25     | 24    | 0      | 0     | 53     | 24    | 55   |
| HF968981                     | 3        | 40                                                 | 25    | 40    | 26     | 25    | 1      | 1     | 54     | 25    | 56   |

**Table 18 Heterozygous SNPs detected by the mapping back of "Rir\_DNA\_PE180" to repeat-masked RIR17**  
(See "Table\_S18.xlsx")

**Table 19 SNPs detected by mapping of the previously assigned data from single-spore DAOM-181602**  
(See "Table\_S19.xlsx")

**Table S20 Commonly observed SNPs between our "Rir\_DNA\_PE180" and the single-spore sequencing data**  
(See "Table\_S20.xlsx")
